# Supplementary material for: Androgen deprivation therapy and the risk of iron-deficiency anaemia among patients with prostate cancer: a population-based cohort study
Source: PubMed Central journal article supplement — BMJ Open. 2020 Mar 25;10(3):e034202. doi: 10.1136/bmjopen-2019-034202 (PMC7170598; doi:10.1136/bmjopen-2019-034202), 2020-03-25
Supplement: bmjopen-2019-034202.draft_revisions.pdf [file bmjopen-2019-034202.draft_revisions.pdf]

# BMJ Open

BMJ Open is committed to open peer review. As part of this commitment we make the peer review history of every article we publish publicly available.

When an article is published we post the peer reviewers' comments and the authors' responses online. We also post the versions of the paper that were used during peer review. These are the versions that the peer review comments apply to.

The versions of the paper that follow are the versions that were submitted during the peer review process. They are not the versions of record or the final published versions. They should not be cited or distributed as the published version of this manuscript.

BMJ Open is an open access journal and the full, final, typeset and author-corrected version of record of the manuscript is available on our site with no access controls, subscription charges or pay-per-view fees (<http://bmjopen.bmj.com>).

If you have any questions on BMJ Open's open peer review process please email [info.bmjopen@bmj.com](mailto:info.bmjopen@bmj.com)

# BMJ Open

## Androgen Deprivation Therapy and Iron-Deficiency Anemia among Patients with Prostate Cancer

|                               |                                                                                                                                                                                                                                                                                                                                                                                                                                          |
|-------------------------------|------------------------------------------------------------------------------------------------------------------------------------------------------------------------------------------------------------------------------------------------------------------------------------------------------------------------------------------------------------------------------------------------------------------------------------------|
| Journal:                      | <i>BMJ Open</i>                                                                                                                                                                                                                                                                                                                                                                                                                          |
| Manuscript ID                 | bmjopen-2019-034202                                                                                                                                                                                                                                                                                                                                                                                                                      |
| Article Type:                 | Original research                                                                                                                                                                                                                                                                                                                                                                                                                        |
| Date Submitted by the Author: | 10-Sep-2019                                                                                                                                                                                                                                                                                                                                                                                                                              |
| Complete List of Authors:     | Wu, Fang-Jen ; West Garden Hospital<br>Li, I-Hsun; Tri-Service General Hospital<br>Chien, Wu-Chien ; National Defense Medical Center<br>Shih, Jui-Hu; Tri-Service General Hospital, Department of Pharmacy Practice<br>Chuang, Chin-Min ; China Medical University Hospital<br>Cheng, Yih-Dih ; China Medical University Hospital, Department of Pharmacy<br>Kao, Li-Ting; Tri-Service General Hospital, Department of Pharmacy Practice |
| Keywords:                     | androgen deprivation therapy, iron-deficiency anemia, prostate cancer, anemia, drug safety                                                                                                                                                                                                                                                                                                                                               |
|                               |                                                                                                                                                                                                                                                                                                                                                                                                                                          |

SCHOLARONE™  
Manuscripts

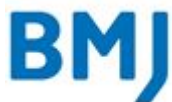

I, the Submitting Author has the right to grant and does grant on behalf of all authors of the Work (as defined in the below author licence), an exclusive licence and/or a non-exclusive licence for contributions from authors who are: i) UK Crown employees; ii) where BMJ has agreed a CC-BY licence shall apply, and/or iii) in accordance with the terms applicable for US Federal Government officers or employees acting as part of their official duties; on a worldwide, perpetual, irrevocable, royalty-free basis to BMJ Publishing Group Ltd ("BMJ") its licensees and where the relevant Journal is co-owned by BMJ to the co-owners of the Journal, to publish the Work in this journal and any other BMJ products and to exploit all rights, as set out in our [licence](#).

The Submitting Author accepts and understands that any supply made under these terms is made by BMJ to the Submitting Author unless you are acting as an employee on behalf of your employer or a postgraduate student of an affiliated institution which is paying any applicable article publishing charge ("APC") for Open Access articles. Where the Submitting Author wishes to make the Work available on an Open Access basis (and intends to pay the relevant APC), the terms of reuse of such Open Access shall be governed by a Creative Commons licence – details of these licences and which [Creative Commons](#) licence will apply to this Work are set out in our licence referred to above.

Other than as permitted in any relevant BMJ Author's Self Archiving Policies, I confirm this Work has not been accepted for publication elsewhere, is not being considered for publication elsewhere and does not duplicate material already published. I confirm all authors consent to publication of this Work and authorise the granting of this licence.

1  
2  
3  
4 **Androgen Deprivation Therapy and Iron-Deficiency Anemia among**  
5  
6 **Patients with Prostate Cancer**  
7  
8  
9

10  
11 Fang-Jen Wu <sup>1</sup> I-Hsun Li <sup>2,3</sup> Wu-Chien Chien <sup>4,5,6</sup> Jui-Hu Shih <sup>2,3</sup>  
12  
13 Chin-Min Chuang <sup>7</sup> Yih-Dih Cheng <sup>8\*</sup> Li-Ting Kao <sup>2,3,4\*</sup>  
14  
15

16  
17 <sup>1</sup> Department of Pharmacy, West Garden Hospital, Taipei, Taiwan

18  
19 <sup>2</sup> Department of Pharmacy Practice, Tri-Service General Hospital, Taipei, Taiwan

20  
21 <sup>3</sup> School of Pharmacy, National Defense Medical Center, Taipei, Taiwan

22  
23 <sup>4</sup> Graduate Institute of Life Sciences, National Defense Medical Center, Taipei, Taiwan

24  
25 <sup>5</sup> Department of Medical Research, Tri-Service General Hospital, National Defense  
26 Medical Center, Taipei, Taiwan.

27  
28 <sup>6</sup> School of Public Health, National Defense Medical Center, Taipei, Taiwan.

29  
30 <sup>7</sup> Emergency Department, China Medical University Hospital

31  
32 <sup>8</sup> Department of Pharmacy, China Medical University Hospital, Taichung City, Taiwan  
33  
34

35  
36 **Corresponding author:** Li-Ting Kao, Department of Pharmacy Practice, Tri-Service  
37 General Hospital, No.325, Sec.2, Chenggong Rd., Neihu District, Taipei City 11490,  
38 Taiwan. Tel: 886-2-8792-3311 ext. 17629, Fax: 886-2-8792-3171, E-mail:  
39 kaoliting@gmail.com  
40  
41  
42

43  
44  
45 \* Li-Ting Kao and Yih-Dih Cheng have equal contributions to this study  
46  
47

48 **Running title:** Androgen Deprivation Therapy and Iron-Deficiency Anemia

49 **Disclosure:** No conflict of financial interest to declare.

50  
51 No funding source.

52  
53 Word count for text: 2855, number of tables/figures: 2/1, number of references: 21  
54  
55  
56  
57  
58  
59  
60

## Abstract

**Objectives:** Administration of androgen deprivation therapy (ADT) for metastatic prostate cancer might be associated with some adverse effects, such as anemia, but very few studies have been performed in East Asian populations. This study aimed to investigate the association between ADT and iron-deficiency anemia (IDA) among prostate cancer patients in a population-based nationwide cohort.

**Design:** Cohort study.

**Setting:** Taiwan.

**Participants:** Data for the cohort study was retrieved from the Taiwan National Health Insurance Research Dataset. Propensity score matching was used to select 8,474 prostate cancer patients who received ADT as study group and 4,237 prostate cancer patients who did not receive ADT as control group.

**Primary and secondary outcome measures:** This study individually tracked each patient for a 3-year study period and identify those who were subsequently diagnosed with IDA following the index date.

**Results:** This study revealed a 3.68 (95% CI 3.29-4.13) and 2.26 (95% CI 1.85-2.77) incidence rate of IDA per 100,000 person-years for prostate cancer patients receiving and not receiving ADT, respectively. Furthermore, proportional Cox regression showed

1  
2  
3  
4  
5 an hazard ratio (HR) for IDA in prostate cancer patients receiving ADT of 1.61 (95%  
6  
7  
8 CI 1.28–2.03) after adjusting for patients' age, monthly income, geographic location,  
9  
10  
11 residential urbanization level, hyperlipidemia, diabetes, hypertension, coronary heart  
12  
13  
14 disease, and inflammatory bowel disease.

15  
16  
17  
18 **Conclusion:** ADT use was found to be associated with a higher risk of IDA compared  
19  
20  
21 with androgen deprivation therapy non-use among patients with prostate cancer.  
22  
23  
24  
25  
26  
27  
28

29 **Key words:** androgen deprivation therapy, iron-deficiency anemia, prostate cancer,  
30  
31  
32 anemia, drug safety.  
33  
34  
35  
36  
37  
38  
39  
40  
41  
42  
43  
44  
45  
46  
47  
48  
49  
50  
51  
52  
53  
54  
55  
56  
57  
58  
59  
60

### Strengths and limitations of this study

1. Data for this cohort study was retrieved from a large, Asian population-based dataset in Taiwan.
2. This study used the propensity score-matched strategy to eliminate the potential bias such as patients' demographic characteristics and comorbidities between the study cohort and the comparison cohort.
3. The sample size and statistical power were sufficient in this study.
4. Selection bias could be eliminated due to the use of population-based dataset.
5. Information on personal history and lifestyle was unavailable when data was retrieved.

**Funding source:** This research received no specific grant from any funding agency in the public, commercial or not-for-profit sectors

**Competing interests:** None declared.

## INTRODUCTION

Prostate cancer (PC) is the leading cause of male cancer and accounts for 293,000 deaths globally.<sup>1,2</sup> In 2018, an estimated 164,690 new male diagnoses and 29,430 deaths from the disease were reported in the United States<sup>3</sup>. Androgen deprivation therapy (ADT), also known as hormone therapy, has been a fundamental component of metastatic PC management for more than half a century.<sup>4</sup> Although androgen deprivation treatment may improve long-term survival for many patients,<sup>5,6</sup> however, decreased serum levels of endogenous androgen in men with PC which have been linked to potential adverse effects, including decreased muscle mass, increased insulin resistance and fall risk.<sup>7-10</sup>

Iron-deficiency anemia (IDA) is a common type of anemia and approximately 5% females and 2% males would experience this clinical symptoms in the United States<sup>11</sup>. More and more studies have recognized as that anemia may have a potential detrimental impact on quality of life and survival among PC patients.<sup>12-15</sup> Previous study (InCHIANTI study) further suggested that androgen deficiency may be a factor that contribute to the development of anemia in men with PC<sup>16</sup>. Some studies had proposed that androgens may stimulate erythropoiesis through directly effect on erythroid progenitor cells and indirectly inhibit on hepcidin.<sup>17-19</sup> Therefore, it is plausible that ADT use may be associated with the incidence of IDA.



1  
2  
3  
4  
5 Accordingly, the association between ADT and anemia has been reported in several  
6  
7  
8 Western studies with Caucasian population.<sup>20-22</sup> To date, very few studies have been  
9  
10  
11 conducted in East Asian populations, even though the hereditary of prostate cancer was  
12  
13  
14 substantially vary by ethnicity and geography.<sup>23</sup> To fill the gap, this study proposed to  
15  
16  
17 examine whether ADT is associated with a subsequent risk of anemia in PC patients by  
18  
19  
20 employing the propensity score-matched strategy with an Asian population-based  
21  
22  
23 dataset in Taiwan.  
24  
25  
26  
27  
28  
29  
30  
31  
32  
33  
34  
35  
36  
37  
38  
39  
40  
41  
42  
43  
44  
45  
46  
47  
48  
49  
50  
51  
52  
53  
54  
55  
56  
57  
58  
59  
60

## METHODS

### Database

Data for the retrospective cohort study was retrieved from the Taiwan National Health Insurance Research Dataset (NHIRD). The NHIRD is derived from the Taiwan Bureau of National Health Insurance. It consists of inpatient and ambulatory medical benefit claims from approximately 22 million enrollees, representing over 99% of Taiwan's population. Therefore, this database provides scientists in Taiwan with an exclusive opportunity to analyze and keep track of medical service use by enrollees since the beginning of the Taiwan National Health Insurance program in 1995. This study was exempt from full revision by the Tri-Service General Hospital Institutional Review Board (TSGHIRB No. 2-105-05-082), since the dataset used was blinded to the public for research purposes.

### Study Sample

This cohort study included a study and a comparison group. For the study group, 28,367 patients who received a first-time diagnosis of PC (ICD-9-CM code 185) between January 1, 2001 to December 31, 2010, were selected from the Registry of Catastrophic Illness Patient Database in NHIRD. A total of 454 patients aged less than 40 years were excluded. The date of ADT administration (including gonadotropin-releasing hormone (GnRH) agonists, antiandrogens, and estrogens) was assigned as the

1  
2  
3  
4  
5 index date for PC patients who subsequently received ADT treatment. Furthermore, the  
6  
7  
8 date of the first outpatient visit in which patients received the diagnosis of PC was set  
9  
10  
11 as the index date for PC patients who did not receive ADT. A total of 681 patients who  
12  
13  
14 had never received a diagnosis of IDA (ICD-9-CM codes 280, 280.0, 280.1, 280.8, and  
15  
16  
17 280.9) prior to their index date were further excluded, as well as 2,730 patients who had  
18  
19  
20 received an orchiectomy. As a result, 24,502 PC patients remained in the study, 20,265  
21  
22  
23 of which received ADT and 4,237 did not receive ADT during the 3-year study period.  
24  
25

26 Propensity score matching was used to identify 8,474 PC patients who received  
27  
28  
29 ADT (two for every PC patient who did not receive ADT) from the remaining ADT  
30  
31  
32 group. Matching variables included age, monthly income, geographic location,  
33  
34  
35 urbanization level of patients' residence (that were divided into 5 levels, with 1 being  
36  
37  
38 the most urbanized and 5 being the least urbanized),<sup>24</sup> hyperlipidemia, diabetes,  
39  
40  
41 hypertension, coronary heart disease, and inflammatory bowel disease. Ultimately,  
42  
43  
44 12,711 patients were enrolled in this study, including 8,474 who received ADT and  
45  
46  
47 4,237 who did not receive ADT. Each patient was subsequently followed individually  
48  
49  
50 for a 3-year study period to identify those who received an IDA diagnosis following  
51  
52  
53 index date.  
54  
55  
56  
57  
58  
59  
60

## Statistical Analysis

All statistical analyses were performed with the SAS system (SAS System for Windows, vers. 9.4 SAS Institute). Chi-squared tests were used to investigate differences in sociodemographic characteristics and medical comorbidities between PC patients receiving and not receiving ADT. Additionally, Cox proportional hazard regressions were conducted to examine the relationship between ADT and IDA risk during the 3-year study period. A total of 2,716 patients who died during the 3-year study period (2,020 ADT use and 796 non - ADT users) were censored. The two-sided  $p$  value=0.05 was used to determine statistical significance.

## Patient and Public Involvement

Patients or public were not involved in the development of the research question, outcome measures, study design, and recruitment/ conducting of the present study.

## RESULTS

This study included 8,474 PC patients receiving ADT and 4,237 propensity score matching PC patients who did not receive ADT. Patients' sociodemographic characteristics and medical comorbidities were shown in Table 1. No statistically significant differences were found in age, monthly income, geographic location, urbanization level of patients' residence, hyperlipidemia, diabetes, hypertension, coronary heart disease, and inflammatory bowel disease between PC patients receiving and not receiving ADT.

IDA incidence during the 3-year study period is presented in Table 2. IDA incidence rate per 100,000 person-years for the 12,711 PC patients was 3.20 (95% CI 2.89-3.53). IDA incidence rate per 100,000 person-years for PC patients receiving and not receiving ADT was 3.68 (95% CI 3.29-4.13) and 2.26 (95% CI 1.85-2.77), respectively. Log-rank test revealed that PC patients receiving ADT had a significantly lower 3-year IDA-free survival rate than patients not receiving ADT ( $p < 0.001$ ). Figure 1 shows the 3-year IDA-free survival curves for the study and comparison groups.

Table 2 further shows that hazard ratio (HR) for IDA in PC patients receiving ADT compared with those not receiving ADT was 1.62 (95% CI 1.29-2.05). After

1  
2  
3  
4  
5 adjusting for patients' age, monthly income, geographic location, residential  
6  
7  
8 urbanization level, hyperlipidemia, diabetes, hypertension, coronary heart disease, and  
9  
10  
11 inflammatory bowel disease, HR for PC patients receiving ADT compared with  
12  
13  
14 nonusers was 1.61 (95% CI 1.28-2.03).  
15  
16  
17  
18  
19  
20  
21  
22  
23  
24  
25  
26  
27  
28  
29  
30  
31  
32  
33  
34  
35  
36  
37  
38  
39  
40  
41  
42  
43  
44  
45  
46  
47  
48  
49  
50  
51  
52  
53  
54  
55  
56  
57  
58  
59  
60

For peer review only

## DISCUSSION

As far as the authors are aware, this is the first study that proposed to investigate the relationship between men receiving ADT for PC and 3-year IDA risk in East Asian populations. This study only included PC patients for relevant analyses in order to avoid the potential effects due to cancer. To mitigate selection bias, propensity score-matched strategy (by age, monthly income, geographical location, residential urbanization level, and medical comorbidities) was used to selected comparisons with PC patients not receiving ADT. In this population-based retrospective cohort study of PC patients, a significant increase in IDA risk was seen with men receiving ADT. The study reported an adjusted HR for IDA among PC patients receiving ADT of 1.61 (95% CI 1.28-2.03).

The findings in our study were consistent with some prior western studies. For instance, among 110 PC patients receiving ADT, one cohort study reported an average hemoglobin drop from 14.8 g/dL at baseline to 12.9 g/dL at evaluation<sup>20</sup>. One Canadian clinical study including 250 PC patients found that the average decline in hemoglobin level of ADT users was a mean of 8.9 g/L<sup>21</sup>. In the United States, Strum et al. demonstrated the low hemoglobin levels in 90% of PC patients receiving ADT<sup>25</sup>. Another study have reported PC patients receiving adjuvant radiotherapy plus ADT, with a decrease in hemoglobin level of 14.8 g/dL from the baseline to a minimum of 10.5 g/dL<sup>26</sup>. In addition, one cohort study using the United Kingdom Clinical Practice

1  
2  
3  
4  
5 Research Database linked to the Hospital Episode Statistics repository found that  
6  
7  
8 prostate patients with ADT had almost three-fold greater risk of anemia than nonusers  
9  
10 (HR 2.90, 95% CI: 2.67-3.16)<sup>22</sup>. Meanwhile, the clinical studies were designed with  
11  
12  
13 small sample sizes and short duration which were mostly performed with Western  
14  
15  
16 population<sup>22</sup>.  
17

18  
19 Our study indicated the association between ADT and 3-year IDA risk among PC  
20  
21  
22 patients; however, anemia that caused by ADT has remained elusive. To date, increasing  
23  
24  
25 biological evidences suggested a potential connection between men receiving ADT  
26  
27  
28 and subsequent IDA risk.<sup>27</sup> A possible explanation for the underlying mechanism may  
29  
30  
31 be that androgen significantly increases the bone marrow erythroid precursors and  
32  
33  
34 enhances the differentiation of bone marrow erythroid stem cells to erythrocytes.<sup>19 28</sup>  
35  
36  
37 Furthermore, testosterone may have an influence on the erythropoietin secretion via  
38  
39  
40 peritubular fibroblast-like cells level in kidney.<sup>29</sup> In animal experiments, testosterone  
41  
42  
43 was able to induce erythropoiesis-stimulating factor by a bioassay using a polycythemic  
44  
45  
46 mouse model.<sup>30</sup> Guo et al. found that the sensitivity of erythropoietin was stimulated  
47  
48  
49 and the stress erythropoiesis could be increased, as result of testosterone upregulated the  
50  
51  
52 expression of GATA binding protein 1 and GATA-dependent genes in the study of aging  
53  
54  
55 male mice<sup>31</sup>. In addition, Bachman et al. indicated that men treated with testosterone  
56  
57  
58 was related to serum hepcidin suppression in a randomized double-blind clinical study.<sup>17</sup>  
59  
60



1  
2  
3  
4  
5 Testosterone directly interact with bone morphogenetic protein-Smad signaling pathway  
6  
7  
8 in hepatocytes and lead to the downregulation of hepcidin transcription.<sup>32</sup> Furthermore,  
9  
10 this effects of androgen on hepatic hepcidin and renal erythropoietin gene expression  
11  
12  
13 could increase systemic iron transport and erythropoietin levels.<sup>32</sup>  
14  
15

16  
17 The strength of our study was the identification of the association between ADT in  
18  
19 PC patients and subsequent IDA risk using a large population-based database. The  
20  
21 Taiwan NHIRD provides high accessibility for medical services and an adequate  
22  
23 statistical power to detect IDA risk between study and comparison groups. Moreover,  
24  
25  
26 PC patients' sociodemographic characteristics and medical comorbidities acknowledged  
27  
28  
29 as risk factors were also included. Furthermore, we also conducted a propensity score-  
30  
31  
32 matched strategy to eliminate what potential bias such as patients' demographic  
33  
34  
35 characteristics and comorbidities between the study cohort and the comparison cohort.  
36  
37  
38  
39

40  
41 Several limitations of our retrospective study should be addressed. The study  
42  
43  
44 lacked information on potentially important patient characteristics, such as body mass  
45  
46  
47 index, smoking, nutrition, or nonprescription medication use. Secondly, it is plausible  
48  
49  
50 that the database did not include all PC patients with IDA in Taiwan, since some of these  
51  
52  
53 patients may seek alternative medicines not recorded by the NHI program. Thirdly,  
54  
55  
56 information on personal history, including family history of anemia was unavailable  
57  
58  
59 when data was retrieved.  
60

## CONCLUSIONS

In conclusion, after adjusting for patient sociodemographic characteristics and comorbid medical disorders, the present study detected an increased IDA risk among PC patients who received ADT during the considered 3-year follow-up. Medical professionals were suggested to be aware of the adverse effect of anemia by using ADT. Clinicians and pharmacists need to consider their PC patients with ADT for the possible IDA risk and determine the efficacy of prevention and treatment modalities for anemia.

## Contributors

Conceptualization: Fang-Jen Wu & Yih-Dih Cheng & Li-Ting Kao; Methodology: Yih-Dih Cheng & Li-Ting Kao & Wu-Chien Chien; Formal analysis and investigation: Fang-Jen Wu & Jui-Hu Shih & Li-Ting Kao; Writing - original draft preparation: Fang-Jen Wu & I-Hsun Li & Chin-Min Chuang & Li-Ting Kao

## Ethics approval

This study was exempt from full revision by the Tri-Service General Hospital Institutional Review Board (TSGHIRB No. 2-105-05-082), since the dataset used was blinded to the public for research purposes.

## Data sharing statement

No additional data available.

**REFERENCES**

1. Fitzmaurice C, Dicker D, Pain A, et al. The Global Burden of Cancer 2013. *JAMA oncology* 2015;1(4):505-27. doi: 10.1001/jamaoncol.2015.0735
2. Attard G, Parker C, Eeles RA, et al. Prostate cancer. *Lancet* 2016;387(10013):70-82. doi: 10.1016/s0140-6736(14)61947-4
3. Siegel RL, Miller KD, Jemal A. Cancer statistics, 2018. *CA Cancer J Clin* 2018;68(1):7-30. doi: 10.3322/caac.21442
4. Shahinian VB, Kuo YF, Gilbert SM. Reimbursement policy and androgen-deprivation therapy for prostate cancer. *N Engl J Med* 2010;363(19):1822-32. doi: 10.1056/NEJMsa0910784
5. Bryant AK, D'Amico AV, Nguyen PL, et al. Three-month posttreatment prostate-specific antigen level as a biomarker of treatment response in patients with intermediate-risk or high-risk prostate cancer treated with androgen deprivation therapy and radiotherapy. *Cancer* 2018;124(14):2939-47. doi: 10.1002/cncr.31400
6. Harris WP, Mostaghel EA, Nelson PS, et al. Androgen deprivation therapy: progress in understanding mechanisms of resistance and optimizing androgen depletion. *Nat Clin Pract Urol* 2009;6(2):76-85. doi: 10.1038/ncpuro1296
7. Basaria S, Muller DC, Carducci MA, et al. Hyperglycemia and insulin resistance in

- 1  
2  
3  
4  
5 men with prostate carcinoma who receive androgen-deprivation therapy. *Cancer*  
6  
7  
8 2006;106(3):581-8. doi: 10.1002/cncr.21642  
9
- 10  
11 8. Grossmann M, Hamilton EJ, Gilfillan C, et al. Bone and metabolic health in patients  
12  
13 with non-metastatic prostate cancer who are receiving androgen deprivation  
14  
15 therapy. *Med J Aust* 2011;194(6):301-6.  
16  
17
- 18  
19 9. Sharifi N, Gulley JL, Dahut WL. Androgen deprivation therapy for prostate cancer.  
20  
21  
22  
23 *Jama* 2005;294(2):238-44. doi: 10.1001/jama.294.2.238  
24  
25
- 26 10. Wu FJ, Sheu SY, Lin HC, et al. Increased Fall Risk in Patients Receiving Androgen  
27  
28 Deprivation Therapy for Prostate Cancer. *Urology* 2016;95:145-50. doi:  
29  
30 10.1016/j.urology.2016.05.058  
31  
32  
33
- 34 11. Johnson-Wimbley TD, Graham DY. Diagnosis and management of iron deficiency  
35  
36 anemia in the 21st century. *Therap Adv Gastroenterol* 2011;4(3):177-84. doi:  
37  
38 10.1177/1756283X11398736  
39  
40  
41  
42
- 43 12. Caro JJ, Salas M, Ward A, et al. Anemia as an independent prognostic factor for  
44  
45 survival in patients with cancer: a systemic, quantitative review. *Cancer*  
46  
47 2001;91(12):2214-21.  
48  
49  
50  
51
- 52 13. Dicato M, Plawny L, Diederich M. Anemia in cancer. *Ann Oncol* 2010;21 Suppl  
53  
54 7:vii167-72. doi: 10.1093/annonc/mdq284  
55  
56  
57
- 58 14. Dueregger A, Heidegger I, Ofer P, et al. The use of dietary supplements to alleviate  
59  
60

- 1  
2  
3  
4 androgen deprivation therapy side effects during prostate cancer treatment.  
5  
6  
7  
8 *Nutrients* 2014;6(10):4491-519. doi: 10.3390/nu6104491  
9  
10  
11 15. Lopez A, Cacoub P, Macdougall IC, et al. Iron deficiency anaemia. *Lancet*  
12  
13 2016;387(10021):907-16. doi: 10.1016/s0140-6736(15)60865-0  
14  
15  
16 16. Ferrucci L, Maggio M, Bandinelli S, et al. Low testosterone levels and the risk of  
17  
18 anemia in older men and women. *Arch Intern Med* 2006;166(13):1380-8. doi:  
19  
20 10.1001/archinte.166.13.1380  
21  
22  
23 17. Bachman E, Feng R, Travison T, et al. Testosterone suppresses hepcidin in men: a  
24  
25 potential mechanism for testosterone-induced erythrocytosis. *J Clin Endocrinol*  
26  
27 *Metab* 2010;95(10):4743-7. doi: 10.1210/jc.2010-0864  
28  
29  
30  
31  
32  
33 18. Latour C, Kautz L, Besson-Fournier C, et al. Testosterone perturbs systemic iron  
34  
35 balance through activation of epidermal growth factor receptor signaling in the  
36  
37 liver and repression of hepcidin. *Hepatology* 2014;59(2):683-94. doi:  
38  
39 10.1002/hep.26648  
40  
41  
42  
43  
44  
45  
46 19. Moriyama Y, Fisher JW. Effects of testosterone and erythropoietin on erythroid  
47  
48 colony formation in human bone marrow cultures. *Blood* 1975;45(5):665-70.  
49  
50  
51  
52 20. D'Amico AV, Saegaert T, Chen MH, et al. Initial decline in hemoglobin during  
53  
54 neoadjuvant hormonal therapy predicts for early prostate specific antigen failure  
55  
56 following radiation and hormonal therapy for patients with intermediate and  
57  
58  
59  
60

- 1  
2  
3  
4  
5 high-risk prostate cancer. *Cancer* 2002;95(2):275-80. doi: 10.1002/cncr.10673  
6  
7  
8 21. Timilshina N, Hussain S, Breunis H, et al. Predictors of hemoglobin decline in non-  
9  
10 metastatic prostate cancer patients on androgen deprivation therapy: a matched  
11  
12 cohort study. *Support Care Cancer* 2011;19(11):1815-21. doi: 10.1007/s00520-  
13  
14 010-1023-6  
15  
16  
17  
18  
19 22. Hicks BM, Klil-Drori AJ, Yin H, et al. Androgen Deprivation Therapy and the Risk  
20  
21 of Anemia in Men with Prostate Cancer. *Epidemiology* 2017;28(5):712-18. doi:  
22  
23 10.1097/ede.0000000000000678  
24  
25  
26  
27  
28 23. Rebbeck TR. Prostate Cancer Genetics: Variation by Race, Ethnicity, and  
29  
30 Geography. *Semin Radiat Oncol* 2017;27(1):3-10. doi:  
31  
32 10.1016/j.semradonc.2016.08.002  
33  
34  
35  
36  
37 24. Liu CY, Hung YT, Chuang YL, et al. Incorporating development stratification of  
38  
39 Taiwan townships into sampling design of large scale health interview survey. *J*  
40  
41 *Health Manag* 2006;4(1):1-22.  
42  
43  
44  
45  
46 25. Strum SB, McDermed JE, Scholz MC, et al. Anaemia associated with androgen  
47  
48 deprivation in patients with prostate cancer receiving combined hormone  
49  
50 blockade. *Br J Urol* 1997;79(6):933-41. doi: 10.1046/j.1464-410x.1997.00234.x  
51  
52  
53  
54  
55 26. Choo R, Chander S, Danjoux C, et al. How are hemoglobin levels affected by  
56  
57 androgen deprivation in non-metastatic prostate cancer patients? *The Canadian*  
58  
59  
60

- 1  
2  
3  
4  
5 *journal of urology* 2005;12(1):2547-52.  
6  
7  
8 27. Shahani S, Braga-Basaria M, Maggio M, et al. Androgens and erythropoiesis: past  
9  
10 and present. *J Endocrinol Invest* 2009;32(8):704-16. doi: 10.1007/bf03345745  
11  
12  
13 28. Dai D, Han S, Li L, et al. Anemia is associated with poor outcomes of metastatic  
14  
15 castration-resistant prostate cancer, a systematic review and meta-analysis.  
16  
17 *American journal of translational research* 2018;10(12):3877-86.  
18  
19  
20 29. Pan X, Suzuki N, Hirano I, et al. Isolation and characterization of renal  
21  
22 erythropoietin-producing cells from genetically produced anemia mice. *PLoS*  
23  
24 *One* 2011;6(10):e25839. doi: 10.1371/journal.pone.0025839  
25  
26  
27  
28 30. Mirand EA, Gordon AS, Wenig J. Mechanism of testosterone action in  
29  
30 erythropoiesis. *Nature* 1965;206(981):270-2. doi: 10.1038/206270a0  
31  
32  
33  
34 31. Guo W, Li M, Bhasin S. Testosterone supplementation improves anemia in aging  
35  
36 male mice. *J Gerontol A Biol Sci Med Sci* 2014;69(5):505-13. doi:  
37  
38 10.1093/gerona/glt127  
39  
40  
41  
42  
43  
44  
45  
46 32. Guo W, Bachman E, Li M, et al. Testosterone administration inhibits hepcidin  
47  
48 transcription and is associated with increased iron incorporation into red blood  
49  
50 cells. *Aging cell* 2013;12(2):280-91. doi: 10.1111/accel.12052  
51  
52  
53  
54  
55  
56  
57  
58  
59  
60



1  
2  
3  
4 **Figure Legends**  
5  
6

7 **Figure 1** Kaplan–Meier curve for iron-deficiency anemia (IDA) among prostate cancer  
8  
9  
10 patients during a 3-year follow-up period, stratified by previous administration or non-  
11  
12  
13 administration of androgen deprivation therapy (ADT)  
14  
15  
16  
17  
18  
19  
20  
21  
22  
23  
24  
25  
26  
27  
28  
29  
30  
31  
32  
33  
34  
35  
36  
37  
38  
39  
40  
41  
42  
43  
44  
45  
46  
47  
48  
49  
50  
51  
52  
53  
54  
55  
56  
57  
58  
59  
60

For peer review only

**Table 1** Demographic characteristics of prostate cancer patients, stratified by previous administration or non-administration of androgen deprivation therapy (ADT) ( $n = 12,711$ )

| Characteristic             | Patients not receiving ADT ( $n = 4,237$ ) |              | Patients receiving ADT ( $n = 8,474$ ) |              | <i>p</i> value |
|----------------------------|--------------------------------------------|--------------|----------------------------------------|--------------|----------------|
|                            | Total no.                                  | Column %     | Total no.                              | Column %     |                |
|                            | Age (years), mean (SD)                     | 70.99 (8.65) |                                        | 71.03 (8.59) |                |
| Urbanization level         |                                            |              |                                        |              | 0.9921         |
| 1 (most urbanized)         | 1,168                                      | 27.57        | 2,326                                  | 27.45        |                |
| 2                          | 990                                        | 23.37        | 1,985                                  | 23.42        |                |
| 3                          | 584                                        | 13.78        | 1,163                                  | 13.72        |                |
| 4                          | 537                                        | 12.67        | 1,056                                  | 12.46        |                |
| 5 (least urbanized)        | 958                                        | 22.61        | 1,944                                  | 22.94        |                |
| Geographic region          |                                            |              |                                        |              | 0.9757         |
| Northern                   | 2,255                                      | 53.22        | 4,500                                  | 53.10        |                |
| Central                    | 994                                        | 23.46        | 1,969                                  | 23.24        |                |
| Southern                   | 948                                        | 22.37        | 1,923                                  | 22.69        |                |
| Eastern                    | 40                                         | 0.94         | 82                                     | 0.97         |                |
| Monthly income             |                                            |              |                                        |              | 0.5705         |
| NT\$0–15,840               | 2,840                                      | 67.03        | 5,741                                  | 67.75        |                |
| NT\$15,841–25,000          | 1,036                                      | 24.45        | 2,053                                  | 24.23        |                |
| ≥NT\$25,001                | 361                                        | 8.52         | 680                                    | 8.02         |                |
| Hypertension               | 2,338                                      | 55.18        | 4,820                                  | 56.88        | 0.0686         |
| Hyperlipidemia             | 894                                        | 21.10        | 1,705                                  | 20.12        | 0.1968         |
| Diabetes                   | 911                                        | 21.50        | 1,790                                  | 21.1         | 0.6237         |
| Coronary heart disease     | 952                                        | 22.47        | 1,802                                  | 21.27        | 0.1205         |
| Inflammatory bowel disease | 37                                         | 0.87         | 70                                     | 0.83         | 0.7836         |

*Notes:* The average exchange rate in 2015 was US\$1.00≈New Taiwan (NT)\$30.

**Table 2** Crude and adjusted hazard ratios (HRs) for anemia among prostate cancer patients during a 3-year follow-up period, stratified by previous administration or non-administration of androgen deprivation therapy (ADT)

| Presence of iron-deficiency anemia               | Total sample<br>(n = 12,711) | Patients receiving ADT<br>(n = 8,474) | Patients not receiving ADT<br>(n = 4,237) |
|--------------------------------------------------|------------------------------|---------------------------------------|-------------------------------------------|
| Three-year follow-up period                      |                              |                                       |                                           |
| Incidence rate per 100,000 person-years (95% CI) | 3.20 (2.89–3.53)             | 3.68 (3.29–4.13)                      | 2.26 (1.85–2.77)                          |
| Crude HR (95% CI)                                | --                           | 1.62*** (1.29–2.05)                   | 1.00                                      |
| Adjusted <sup>a</sup> HR (95% CI)                | --                           | 1.61*** (1.28–2.03)                   | 1.00                                      |

Notes: <sup>a</sup> Using a Cox proportional regression with cases censored if individuals died during the 3-year follow-up period; <sup>a</sup> Adjustments were made for patients’ geographic location, monthly income, urbanization level, age, hyperlipidemia, diabetes, hypertension, coronary heart disease, and inflammatory bowel disease.

\*  $p < 0.05$ . \*\*  $p < 0.01$ . \*\*\*  $p \leq 0.001$

CI, confidence interval

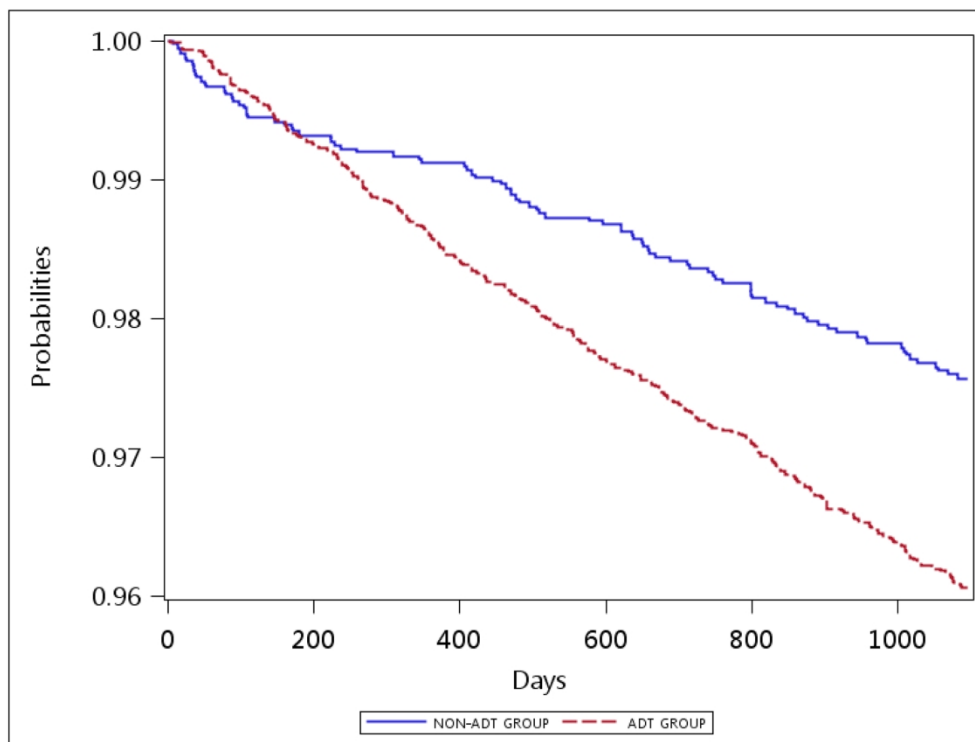

Figure 1 Kaplan–Meier curve for iron-deficiency anemia (IDA) among prostate cancer patients during a 3-year follow-up period, stratified by previous administration or non-administration of androgen deprivation therapy (ADT)

199x149mm (300 x 300 DPI)

**STROBE 2007 (v4) Statement—Checklist of items that should be included in reports of *cohort studies***

| Section/Topic                | Item # | Recommendation                                                                                                                                                                       | Reported on page # |
|------------------------------|--------|--------------------------------------------------------------------------------------------------------------------------------------------------------------------------------------|--------------------|
| Title and abstract           | 1      | (a) Indicate the study's design with a commonly used term in the title or the abstract                                                                                               | 2                  |
|                              |        | (b) Provide in the abstract an informative and balanced summary of what was done and what was found                                                                                  | 2                  |
| <b>Introduction</b>          |        |                                                                                                                                                                                      |                    |
| Background/rationale         | 2      | Explain the scientific background and rationale for the investigation being reported                                                                                                 | 5                  |
| Objectives                   | 3      | State specific objectives, including any prespecified hypotheses                                                                                                                     | 6                  |
| <b>Methods</b>               |        |                                                                                                                                                                                      |                    |
| Study design                 | 4      | Present key elements of study design early in the paper                                                                                                                              | 7                  |
| Setting                      | 5      | Describe the setting, locations, and relevant dates, including periods of recruitment, exposure, follow-up, and data collection                                                      | 7-8                |
| Participants                 | 6      | (a) Give the eligibility criteria, and the sources and methods of selection of participants. Describe methods of follow-up                                                           | 7-8                |
|                              |        | (b) For matched studies, give matching criteria and number of exposed and unexposed                                                                                                  | 7-8                |
| Variables                    | 7      | Clearly define all outcomes, exposures, predictors, potential confounders, and effect modifiers. Give diagnostic criteria, if applicable                                             | 7-8                |
| Data sources/<br>measurement | 8*     | For each variable of interest, give sources of data and details of methods of assessment (measurement). Describe comparability of assessment methods if there is more than one group | 7-8                |
| Bias                         | 9      | Describe any efforts to address potential sources of bias                                                                                                                            | 7-8                |
| Study size                   | 10     | Explain how the study size was arrived at                                                                                                                                            | 7-8                |
| Quantitative variables       | 11     | Explain how quantitative variables were handled in the analyses. If applicable, describe which groupings were chosen and why                                                         | 7-8                |
| Statistical methods          | 12     | (a) Describe all statistical methods, including those used to control for confounding                                                                                                | 9                  |
|                              |        | (b) Describe any methods used to examine subgroups and interactions                                                                                                                  | 9                  |
|                              |        | (c) Explain how missing data were addressed                                                                                                                                          | 9                  |
|                              |        | (d) If applicable, explain how loss to follow-up was addressed                                                                                                                       | 9                  |
|                              |        | (e) Describe any sensitivity analyses                                                                                                                                                | 9                  |
| <b>Results</b>               |        |                                                                                                                                                                                      |                    |

|                          |     |                                                                                                                                                                                                              |       |
|--------------------------|-----|--------------------------------------------------------------------------------------------------------------------------------------------------------------------------------------------------------------|-------|
| Participants             | 13* | (a) Report numbers of individuals at each stage of study—eg numbers potentially eligible, examined for eligibility, confirmed eligible, included in the study, completing follow-up, and analysed            | 10-11 |
|                          |     | (b) Give reasons for non-participation at each stage                                                                                                                                                         | 10-11 |
|                          |     | (c) Consider use of a flow diagram                                                                                                                                                                           | 10-11 |
| Descriptive data         | 14* | (a) Give characteristics of study participants (eg demographic, clinical, social) and information on exposures and potential confounders                                                                     | 10-11 |
|                          |     | (b) Indicate number of participants with missing data for each variable of interest                                                                                                                          | 10-11 |
|                          |     | (c) Summarise follow-up time (eg, average and total amount)                                                                                                                                                  | 10-11 |
| Outcome data             | 15* | Report numbers of outcome events or summary measures over time                                                                                                                                               | 10-11 |
| Main results             | 16  | (a) Give unadjusted estimates and, if applicable, confounder-adjusted estimates and their precision (eg, 95% confidence interval). Make clear which confounders were adjusted for and why they were included | 10-11 |
|                          |     | (b) Report category boundaries when continuous variables were categorized                                                                                                                                    | 10-11 |
|                          |     | (c) If relevant, consider translating estimates of relative risk into absolute risk for a meaningful time period                                                                                             | 10-11 |
| Other analyses           | 17  | Report other analyses done—eg analyses of subgroups and interactions, and sensitivity analyses                                                                                                               | 10-11 |
| <b>Discussion</b>        |     |                                                                                                                                                                                                              |       |
| Key results              | 18  | Summarise key results with reference to study objectives                                                                                                                                                     | 13    |
| <b>Limitations</b>       |     |                                                                                                                                                                                                              |       |
| Interpretation           | 20  | Give a cautious overall interpretation of results considering objectives, limitations, multiplicity of analyses, results from similar studies, and other relevant evidence                                   | 15    |
| Generalisability         | 21  | Discuss the generalisability (external validity) of the study results                                                                                                                                        | 15    |
| <b>Other information</b> |     |                                                                                                                                                                                                              |       |
| Funding                  | 22  | Give the source of funding and the role of the funders for the present study and, if applicable, for the original study on which the present article is based                                                | 4     |

\*Give information separately for cases and controls in case-control studies and, if applicable, for exposed and unexposed groups in cohort and cross-sectional studies.

**Note:** An Explanation and Elaboration article discusses each checklist item and gives methodological background and published examples of transparent reporting. The STROBE checklist is best used in conjunction with this article (freely available on the Web sites of PLoS Medicine at <http://www.plosmedicine.org/>, Annals of Internal Medicine at <http://www.annals.org/>, and Epidemiology at <http://www.epidem.com/>). Information on the STROBE Initiative is available at [www.strobe-statement.org](http://www.strobe-statement.org).

# BMJ Open

## Androgen Deprivation Therapy and the Risk of Iron-Deficiency Anaemia among Patients with Prostate Cancer: A Population-based Cohort Study

|                                 |                                                                                                                                                                                                                                                                                                                                                                                                                                                                                                                        |
|---------------------------------|------------------------------------------------------------------------------------------------------------------------------------------------------------------------------------------------------------------------------------------------------------------------------------------------------------------------------------------------------------------------------------------------------------------------------------------------------------------------------------------------------------------------|
| Journal:                        | <i>BMJ Open</i>                                                                                                                                                                                                                                                                                                                                                                                                                                                                                                        |
| Manuscript ID                   | bmjopen-2019-034202.R1                                                                                                                                                                                                                                                                                                                                                                                                                                                                                                 |
| Article Type:                   | Original research                                                                                                                                                                                                                                                                                                                                                                                                                                                                                                      |
| Date Submitted by the Author:   | 24-Dec-2019                                                                                                                                                                                                                                                                                                                                                                                                                                                                                                            |
| Complete List of Authors:       | Wu, Fang-Jen ; West Garden Hospital<br>Li, I-Hsun; Tri-Service General Hospital<br>Chien, Wu-Chien ; National Defense Medical Center<br>Shih, Jui-Hu; Tri-Service General Hospital, Department of Pharmacy Practice<br>Lin, Yi-Chun ; Research Center of Biostatistics, Taipei Medical University<br>Chuang, Chin-Min ; China Medical University Hospital<br>Cheng, Yih-Dih ; China Medical University Hospital, Department of Pharmacy<br>Kao, Li-Ting; Tri-Service General Hospital, Department of Pharmacy Practice |
| <b>Primary Subject Heading</b>: | Urology                                                                                                                                                                                                                                                                                                                                                                                                                                                                                                                |
| Secondary Subject Heading:      | Epidemiology, Pharmacology and therapeutics                                                                                                                                                                                                                                                                                                                                                                                                                                                                            |
| Keywords:                       | androgen deprivation therapy, iron-deficiency anemia, prostate cancer, anemia, drug safety                                                                                                                                                                                                                                                                                                                                                                                                                             |
|                                 |                                                                                                                                                                                                                                                                                                                                                                                                                                                                                                                        |

SCHOLARONE™  
Manuscripts



I, the Submitting Author has the right to grant and does grant on behalf of all authors of the Work (as defined in the below author licence), an exclusive licence and/or a non-exclusive licence for contributions from authors who are: i) UK Crown employees; ii) where BMJ has agreed a CC-BY licence shall apply, and/or iii) in accordance with the terms applicable for US Federal Government officers or employees acting as part of their official duties; on a worldwide, perpetual, irrevocable, royalty-free basis to BMJ Publishing Group Ltd ("BMJ") its licensees and where the relevant Journal is co-owned by BMJ to the co-owners of the Journal, to publish the Work in this journal and any other BMJ products and to exploit all rights, as set out in our [licence](#).

The Submitting Author accepts and understands that any supply made under these terms is made by BMJ to the Submitting Author unless you are acting as an employee on behalf of your employer or a postgraduate student of an affiliated institution which is paying any applicable article publishing charge ("APC") for Open Access articles. Where the Submitting Author wishes to make the Work available on an Open Access basis (and intends to pay the relevant APC), the terms of reuse of such Open Access shall be governed by a Creative Commons licence – details of these licences and which [Creative Commons](#) licence will apply to this Work are set out in our licence referred to above.

Other than as permitted in any relevant BMJ Author's Self Archiving Policies, I confirm this Work has not been accepted for publication elsewhere, is not being considered for publication elsewhere and does not duplicate material already published. I confirm all authors consent to publication of this Work and authorise the granting of this licence.



1  
2  
3  
4 **Androgen Deprivation Therapy and the Risk of Iron-Deficiency Anaemia**  
5  
6 **among Patients with Prostate Cancer: A Population-based Cohort Study**  
7

8 Fang-Jen Wu<sup>1</sup> I-Hsun Li<sup>2,3</sup> Wu-Chien Chien<sup>4,5,6</sup> Jui-Hu Shih<sup>2,3</sup>  
9 Yi-Chun Lin<sup>7</sup> Chin-Min Chuang<sup>8</sup> Yih-Dih Cheng<sup>9\*</sup> Li-Ting Kao<sup>2,3,4\*</sup>  
10  
11  
12  
13

14 <sup>1</sup> Department of Pharmacy, West Garden Hospital, Taipei, Taiwan

15  
16 <sup>2</sup> Department of Pharmacy Practice, Tri-Service General Hospital, Taipei, Taiwan

17  
18 <sup>3</sup> School of Pharmacy, National Defense Medical Center, Taipei, Taiwan

19  
20 <sup>4</sup> Graduate Institute of Life Sciences, National Defense Medical Center, Taipei, Taiwan

21  
22  
23 <sup>5</sup> Department of Medical Research, Tri-Service General Hospital, National Defense  
24  
25  
26  
27  
28  
29  
30  
31  
32  
33  
34  
35  
36  
37  
38  
39  
40  
41  
42  
43  
44  
45  
46  
47  
48  
49  
50  
51  
52  
53  
54  
55  
56  
57  
58  
59  
60  
Medical Center, Taipei, Taiwan.

<sup>6</sup> School of Public Health, National Defense Medical Center, Taipei, Taiwan.

<sup>7</sup> Research Center of Biostatistics, Taipei Medical University

<sup>8</sup> Emergency Department, China Medical University Hospital

<sup>9</sup> Department of Pharmacy, China Medical University Hospital, Taichung City, Taiwan

**Corresponding author:** Li-Ting Kao, Department of Pharmacy Practice, Tri-Service  
General Hospital, No.325, Sec.2, Chenggong Rd., Neihu District, Taipei City 11490,  
Taiwan. Tel: 886-2-8792-3311 ext. 17629, Fax: 886-2-8792-3171, E-mail:  
kaoliting@gmail.com

\* Li-Ting Kao and Yih-Dih Cheng have equal contributions to this study

**Running title:** Androgen Deprivation Therapy and Iron-Deficiency Anaemia

**Disclosure:** No conflict of financial interest to declare.

**No funding source.**

**Word count for text:** 2195, **number of tables/figures:** 3/1, **number of references:**

37

## Abstract

**Objectives:** The administration of androgen deprivation therapy (ADT) to patients with metastatic prostate cancer might be associated with some adverse effects such as anaemia; however, few studies have been performed in East Asian populations. This study aimed to investigate the association between ADT and iron-deficiency anaemia (IDA) among patients with prostate cancer in a population-based nationwide cohort.

**Design:** Cohort study.

**Setting:** Taiwan.

**Participants:** Data for the cohort study were retrieved from the Taiwan National Health Insurance Research Database. Propensity score matching was used to select 8474 patients with prostate cancer who received ADT as the study group and 4237 patients with 4237 who did not receive ADT as the control group.

**Primary and secondary outcome measures:** This study individually tracked patients over a 3-year study period and identified those who were subsequently diagnosed with IDA following the index date.

**Results:** The incidence rates of IDA in the study and control groups were 1.35 (95% confidence interval [CI] = 1.20–1.51) and 0.83 per 100 person-years (95% CI = 0.67–1.01), respectively. Furthermore, proportional Cox regression revealed a hazard ratio

1  
2  
3  
4  
5 (HR) of 1.61 (95% CI = 1.28–2.03) for IDA in the study group after adjusting for  
6  
7  
8 patients' age, monthly income, geographic location, residential urbanisation level and  
9  
10  
11 incidence of hyperlipidemia, diabetes, hypertension, coronary heart disease,  
12  
13  
14 inflammatory bowel disease, other cancers and gastrointestinal bleeding.  
15  
16

17  
18 **Conclusion:** Compared with its non-use among patients with prostate cancer, ADT use  
19  
20 was associated with a higher risk of IDA.  
21  
22  
23  
24  
25  
26  
27  
28

29 **Key words:** androgen deprivation therapy, iron-deficiency anaemia, prostate cancer,  
30  
31 anaemia, drug safety  
32  
33  
34  
35  
36  
37  
38  
39  
40  
41  
42  
43  
44  
45  
46  
47  
48  
49  
50  
51  
52  
53  
54  
55  
56  
57  
58  
59  
60

### Strengths and limitations of this study

1. Data for this cohort study were retrieved from a large Asian population-based dataset in Taiwan.
2. This study used a propensity score matching strategy to eliminate potential biases such as patients' demographics and comorbidities between the study and control cohorts.
3. The sample size and statistical power were sufficient in this study.
4. Selection bias may have been eliminated by the use of a population-based dataset.
5. Information on personal history and lifestyle was unavailable when data were retrieved.

**Funding source:** This research received no specific grant from any funding agency in the public, commercial or not-for-profit sectors

**Competing interests:** None declared.

## INTRODUCTION

Prostate cancer (PCa) is the leading cause of cancer in males, and it accounted for 293,000 deaths globally in 2013.<sup>1 2</sup> In 2018, an estimated 164,690 new diagnoses in males and 29,430 deaths from the disease were reported in the United States.<sup>3</sup> Androgen deprivation therapy (ADT), also known as hormone therapy, has been a fundamental component of metastatic PCa management for more than half a century.<sup>4</sup> This therapy can improve long-term survival for many patients.<sup>5 6</sup> However, the decreased serum levels of endogenous androgen associated with ADT might result in some adverse effects, including decreased muscle mass, increased insulin resistance and fall risk, among patients with PCa.<sup>7-12</sup>

Iron-deficiency anaemia (IDA) is a common disease that affects approximately 5% of females and 2% of males in the United States.<sup>13</sup> Increasing numbers of studies have recognised that anaemia may have a potentially detrimental impact on the quality of life and survival of patients with PCa.<sup>14-17</sup> A previous study (InCHIANTI study) further suggested that androgen deficiency contributes to the development of anaemia in men with PCa.<sup>18</sup> Some studies proposed that androgens may stimulate erythropoiesis through direct effects on erythroid progenitor cells and indirect inhibitory effects on hepcidin.<sup>19-21</sup> Therefore, it is plausible that ADT may be associated with the incidence of IDA.

1  
2  
3  
4  
5 Accordingly, the association between ADT and anaemia has been reported in  
6  
7 several Western studies using Caucasian populations.<sup>22-24</sup> However, to date, few studies  
8  
9 have been conducted in East Asian populations even though the hereditary risk of PCa  
10  
11 substantially varies by ethnicity and geography.<sup>25 26</sup> In addition, the haemoglobin  
12  
13 concentration, which is a critical indicator of anaemia, is recognised to vary by  
14  
15 race/ethnicity, lifestyle, demographics and other variables.<sup>27</sup> Furthermore, a recent study  
16  
17 of 32 patients receiving ADT demonstrated that haematologic toxicities such as anaemia  
18  
19 were more frequent in Chinese patients with PCa than in their Western counterparts.<sup>28</sup>  
20  
21 Consequently, this study examined whether ADT is associated with a subsequent risk  
22  
23 of anaemia in patients with PCa by employing a propensity score matching strategy  
24  
25 using an Asian population-based dataset in Taiwan.  
26  
27  
28  
29  
30  
31  
32  
33  
34  
35  
36  
37  
38  
39  
40  
41  
42  
43  
44  
45  
46  
47  
48  
49  
50  
51  
52  
53  
54  
55  
56  
57  
58  
59  
60

## METHODS

### Database

Data for the retrospective cohort study were retrieved from the Taiwan National Health Insurance Research Database (NHIRD). The NHIRD, which derived from the Taiwan Bureau of National Health Insurance, consists of inpatient and ambulatory medical benefit claims from approximately 22 million enrollees, representing more than 99% of Taiwan's population. Therefore, this database provides scientists in Taiwan with an exclusive opportunity to analyse and track medical service use by enrollees since the beginning of the Taiwan National Health Insurance programme in 1995. This study was exempt from full revision by the Tri-Service General Hospital Institutional Review Board (TSGHIRB No. 2-105-05-082) because the dataset used was blinded to the public for research purposes.

### Study Sample

This cohort study included study and control groups. For the study group, 28,367 patients who received a first-time diagnosis of PCa (ICD-9-CM code 185) between January 1, 2001 and December 31, 2010 were selected from the Registry of Catastrophic Illness Patient Database in NHIRD. In total, 454 patients younger than 40 years were excluded because the prevalence of PCa is extremely low in this age strata. The date of ADT administration (including gonadotropin-releasing hormone agonists, anti-

1  
2  
3  
4  
5 androgens, ketoconazole and estrogens; ATC codes L02AE03, L02AE02, L02AE04,  
6  
7 L02BB03, G03HA01, L02BB01, J02AB02 and L02AA) was assigned as the index date  
8  
9  
10 for patients with PCa who subsequently received ADT treatment. Furthermore, the date  
11  
12  
13 of a randomly selected outpatient visit was assigned as the index date for the diagnosis  
14  
15  
16 of PCa for patients who did not receive ADT. Meanwhile, 681 patients who had received  
17  
18  
19 a diagnosis of IDA (ICD-9-CM codes 280, 280.0, 280.1, 280.8 and 280.9) and 2730  
20  
21  
22 patients who had undergone orchiectomy prior to their index date were excluded. As a  
23  
24  
25 result, 24,502 patients with PCa remained in the study, including 20,265 and 4237  
26  
27  
28 patients with ADT use and non-use, respectively, during the 3-year study period.  
29  
30  
31 Specifically, 49.50, 17.98, 15.74, and 16.78% of the ADT prescriptions were for  
32  
33  
34 cyproterone, bicalutamide, flutamide and other types of medications, respectively. The  
35  
36  
37 average time from PCa diagnosis was approximately 111.17 days in our study.

40  
41 Propensity score matching was used to identify 8474 patients with PCa who  
42  
43  
44 received ADT. This methodology could eliminate the differences attributable to  
45  
46  
47 differences in patient demographics and medical history between the groups. We used  
48  
49  
50 propensity score matching using the Mahalanobis metric (caliper of 0.25 standard  
51  
52  
53 deviations of the propensity score). The matching variables included age, monthly  
54  
55  
56 income, geographic location, residential urbanisation level (divided into five levels, with  
57  
58  
59 1 being the most urbanised and 5 being the least urbanised),<sup>29</sup> hyperlipidaemia, diabetes,  
60



1  
2  
3  
4 hypertension, coronary heart disease and inflammatory bowel disease. We performed a  
5  
6  
7  
8 2:1 matching study, because increasing sample size of cases or controls could increase  
9  
10  
11 the statistic power of the findings. Ultimately, 12,711 patients were enrolled in this  
12  
13  
14 study, including 8474 who received ADT and 4237 who did not receive ADT. We  
15  
16  
17 categorised the patients receiving ADT into two levels according to the median duration  
18  
19  
20 of ADT use (median = 353 days). The power for this study was adequate (power =  
21  
22  
23 0.987). Each patient was subsequently followed individually for a 3-year period to  
24  
25  
26 identify those who received an IDA diagnosis following the index date.  
27  
28  
29

### 30 **Statistical Analysis**

31  
32 All statistical analyses were performed using the SAS System for Windows (ver.  
33  
34 9.4, SAS Institute). Chi-squared tests were used to investigate differences in  
35  
36 sociodemographic characteristics and medical comorbidities between the study and  
37  
38 control groups. Additionally, Cox proportional hazard regression analysis was  
39  
40  
41 conducted to examine the relationship between ADT use and IDA risk during the 3-year  
42  
43  
44 study period. Data for patients who died or who were lost to follow-up during the study  
45  
46  
47 period were censored in the Cox regression. In total, 2716 patients died during the 3-  
48  
49  
50 year study period (2020 ADT users and 796 non-users). A two-sided  $p$  value  $< 0.05$   
51  
52  
53 denoted statistical significance.  
54  
55  
56  
57  
58  
59  
60

## Patient and Public Involvement

Patients and the public were not involved in the development of the research question, outcome measures, study design and recruitment/conduct of the present study.

For peer review only

## RESULTS

Data for patients' sociodemographic characteristics and medical comorbidities are shown in Table 1. No statistically significant differences were found regarding age, monthly income, geographic location, residential urbanisation level and the incidence of hyperlipidaemia, diabetes, hypertension, coronary heart disease and inflammatory bowel disease between the study and control groups.

The incidence of IDA during the 3-year study period is presented in Table 2. The IDA incidence rate per 100 person-years for the entire 12,711-patient cohort was 1.17 (95% confidence interval [CI] = 1.05–1.29). The incidence rates per 100 person-years for the study and control groups were 1.35 (95% CI = 1.20–1.51) and 0.83 (95% CI = 0.67–1.01), respectively. The log-rank test revealed that the study group had a significantly lower 3-year IDA-free survival rate than the control group ( $p < 0.001$ , Figure 1).

Table 2 further illustrates that the hazard ratio (HR) for IDA in the study group relative to the findings in the control group was 1.62 (95% CI = 1.29–2.05;  $p \leq 0.001$ ). After adjusting for patients' age, monthly income, geographic location, residential urbanisation level and the incidence of hyperlipidemia, diabetes, hypertension, coronary heart disease, inflammatory bowel disease, other cancers and gastrointestinal

1  
2  
3  
4  
5 bleeding, the HR for the study group compared with the control group was 1.61 (95%  
6  
7  
8 CI = 1.28–2.03;  $p \leq 0.001$ ). This study further classified patients in the study group as  
9  
10 short-term and long-term ADT users based on the median duration of use. Data  
11  
12 presented in Table 3 reveal that both short-term and long-term and ADT use can  
13  
14 increase the risk of anaemia. Compared with the findings in the control group, the  
15  
16 adjusted HRs for long-term and short-term ADT use in the study group were 1.65 (95%  
17  
18  
19 CI = 1.28–2.13) and 1.56 (95% CI = 1.19–2.04), respectively.  
20  
21  
22  
23  
24  
25  
26  
27  
28  
29  
30  
31  
32  
33  
34  
35  
36  
37  
38  
39  
40  
41  
42  
43  
44  
45  
46  
47  
48  
49  
50  
51  
52  
53  
54  
55  
56  
57  
58  
59  
60

## DISCUSSION

To the best of our knowledge, this is the first study to investigate the relationship between ADT use in men with PCa and the 3-year IDA risk in an East Asian population. This study only included patients with PCa in the relevant analyses to avoid the potential effects attributable to cancer. To mitigate selection bias, a propensity score matching strategy (by age, monthly income, geographical location, residential urbanisation level and medical comorbidities) was used to facilitate comparisons with patients with PCa who did not receive ADT. In this population-based retrospective cohort study of patients with PCa, a significant increase in IDA risk was observed with men treated with ADT.

The findings were consistent with those of prior Western studies. For instance, in the United States, Strum et al. demonstrated that the haemoglobin levels of patients who received ADT for PCa declined from a mean of 149 g/L at baseline to 139, 132 and 131 g/L after 1, 2 and 3 months, respectively.<sup>30</sup> In Canada, Timilshina et al. performed an observational study of 250 patients with non-metastatic PCa and found that ADT was independently associated with a reduction of haemoglobin levels over 12 months.<sup>23</sup> Among 110 patients with PCa who received ADT, one cohort study reported a decline in haemoglobin levels from 14.8 g/dL at baseline to 12.9 g/dL at evaluation.<sup>22</sup> Another study of 72 patients with non-metastatic PCa who received adjuvant radiotherapy plus ADT reported that the haemoglobin level had significant declined after 2 years of

1  
2  
3  
4  
5 androgen suppression.<sup>31</sup> All of these studies investigated the association of ADT with  
6  
7  
8 haemoglobin levels, which is vital given that haemoglobin levels are important for  
9  
10  
11 identifying anaemia. However, these clinical studies included small sample sizes and  
12  
13  
14 featured a short duration.<sup>22 23 30 31</sup> Separately, Hicks et al. performed a cohort study using  
15  
16  
17 the United Kingdom Clinical Practice Research Database linked to the Hospital Episode  
18  
19  
20 Statistics repository. Their findings revealed that patients with non-metastatic PCa who  
21  
22  
23 received ADT had a nearly 3-fold greater risk of anaemia than non-users (HR = 2.90,  
24  
25  
26 95% CI = 2.67–3.16).<sup>24</sup> However, this study was performed in a Western population,  
27  
28  
29 and generalisation of its findings to other ethnic groups is not possible.

30  
31  
32 Our study examined the association between ADT and the 3-year IDA risk among  
33  
34  
35 patients with PCa; however, the risk of anaemia caused by ADT use has remained  
36  
37  
38 unclear. To date, increasing biological evidence has suggested a potential connection  
39  
40  
41 between the receipt of ADT and subsequent IDA risk.<sup>32</sup> A possible explanation for the  
42  
43  
44 underlying mechanism may be that androgen significantly increases the levels of bone  
45  
46  
47 marrow erythroid precursors and enhances the differentiation of bone marrow erythroid  
48  
49  
50 stem cells to erythrocytes.<sup>21 33</sup> Furthermore, testosterone might influence erythropoietin  
51  
52  
53 secretion via peritubular fibroblast-like cells in the kidneys.<sup>34</sup> In animal experiments,  
54  
55  
56 testosterone induced erythropoiesis-stimulating factor production in a bioassay using a  
57  
58  
59 mouse model of polycythaemia vera.<sup>35</sup> Guo et al. found that sensitivity to erythropoietin  
60

1  
2  
3  
4  
5 was induced and stress erythropoiesis was increased by testosterone, which upregulated  
6  
7  
8 the expression of GATA binding protein 1 and GATA-dependent genes, in a study of  
9  
10  
11 ageing male mice.<sup>36</sup> In addition, Bachman et al. observed that treatment with  
12  
13  
14 testosterone in men was related to serum hepcidin suppression in a randomised double-  
15  
16  
17 blind clinical study.<sup>19</sup> Testosterone directly interacts with the bone morphogenetic  
18  
19  
20 protein-Smad signalling pathway in hepatocytes and induces the downregulation of  
21  
22  
23 hepcidin transcription.<sup>37</sup> Furthermore, these effects of androgen on hepatic hepcidin and  
24  
25  
26 renal erythropoietin gene expression could increase systemic iron transport and  
27  
28  
29 erythropoietin levels.<sup>37</sup>

30  
31  
32 The strengths of our study included the identification of the association between  
33  
34  
35 ADT use in patients with PCa and subsequent IDA risk using a large population-based  
36  
37  
38 database. The Taiwan NHIRD provides high accessibility to medical service data and  
39  
40  
41 adequate to detect IDA risk between the study and control groups. Moreover, the  
42  
43  
44 sociodemographic characteristics and medical comorbidities of patients with PCa were  
45  
46  
47 acknowledged as risk factors. Furthermore, we also used a propensity score matching  
48  
49  
50 strategy to eliminate potential biases such as patients' demographics and comorbidities  
51  
52  
53 between the study and control cohorts.

54  
55  
56 Several limitations of our retrospective study should be addressed. The study  
57  
58  
59 lacked information on potentially important patient characteristics, such as body mass  
60

1  
2  
3  
4  
5 index, smoking, nutrition and non-prescription medication use. Second, it is plausible  
6  
7  
8 that the database did not include all patients with PCa and IDA in Taiwan because some  
9  
10  
11 patients might have sought alternative medicines not recorded by the NHI programme  
12  
13  
14 and some patients with mild or normocytic anaemia may not have immediately sought  
15  
16  
17 medical treatment. Therefore, these patients might not have been captured via diagnosis  
18  
19  
20 codes. Third, information on the family history of anaemia, cancer stage and grade for  
21  
22  
23 the presence of metastases, chemotherapy, radiotherapy and surgery was unavailable  
24  
25  
26 this study. Finally, this study lacked information regarding blood variables.  
27  
28  
29 Nevertheless, this study identified patients with PCa who used ADT as cases and  
30  
31  
32 patients with PCa patients who did not use ADT as controls. In general, physicians in  
33  
34  
35 Taiwan perform complete blood counts for patients with PCa to identify suitable  
36  
37  
38 treatments. Consequently, we considered that these factors may not have affected the  
39  
40  
41 findings in this study.

## 42 43 44 45 **CONCLUSIONS**

46  
47  
48 In conclusion, the present study detected an increased IDA risk during a 3-year  
49  
50  
51 follow-up period among patients with PCa who received ADT. Medical professionals  
52  
53  
54 are recommended to be aware of the risk of anaemia following ADT. Clinicians and  
55  
56  
57 pharmacists need to consider the possible risk of IDA among patients with PCa who  
58  
59  
60 received ADT and assess the efficacy of preventative and treatment modalities for



1  
2  
3  
4  
5  
6  
7  
8  
9  
10  
11  
12  
13  
14  
15  
16  
17  
18  
19  
20  
21  
22  
23  
24  
25  
26  
27  
28  
29  
30  
31  
32  
33  
34  
35  
36  
37  
38  
39  
40  
41  
42  
43  
44  
45  
46  
47  
48  
49  
50  
51  
52  
53  
54  
55  
56  
57  
58  
59  
60

anaemia.

For peer review only

**Contributors**

Conceptualisation: Fang-Jen Wu, Yih-Dih Cheng and Li-Ting Kao; Methodology: Yih-Dih Cheng, Yi-Chun Lin, Li-Ting Kao and Wu-Chien Chien; Formal analysis and investigation: Fang-Jen Wu, Jui-Hu Shih and Li-Ting Kao; Writing - original draft preparation: Fang-Jen Wu, I-Hsun Li, Chin-Min Chuang and Li-Ting Kao

**Ethics approval**

This study was exempt from full revision by the Tri-Service General Hospital Institutional Review Board (TSGHIRB No. 2-105-05-082) because the dataset used was blinded to the public for research purposes.

**Data sharing statement**

No additional data available.

**REFERENCES**

1. Fitzmaurice C, Dicker D, Pain A, et al. The Global Burden of Cancer 2013. *JAMA oncology* 2015;1(4):505-27. doi: 10.1001/jamaoncol.2015.0735
2. Attard G, Parker C, Eeles RA, et al. Prostate cancer. *Lancet* 2016;387(10013):70-82. doi: 10.1016/S0140-6736(14)61947-4
3. Siegel RL, Miller KD, Jemal A. Cancer statistics, 2018. *CA Cancer J Clin* 2018;68(1):7-30. doi: 10.3322/caac.21442
4. Shahinian VB, Kuo YF, Gilbert SM. Reimbursement policy and androgen-deprivation therapy for prostate cancer. *N Engl J Med* 2010;363(19):1822-32. doi: 10.1056/NEJMsa0910784
5. Bryant AK, D'Amico AV, Nguyen PL, et al. Three-month posttreatment prostate-specific antigen level as a biomarker of treatment response in patients with intermediate-risk or high-risk prostate cancer treated with androgen deprivation therapy and radiotherapy. *Cancer* 2018;124(14):2939-47. doi: 10.1002/cncr.31400
6. Harris WP, Mostaghel EA, Nelson PS, et al. Androgen deprivation therapy: progress in understanding mechanisms of resistance and optimizing androgen depletion. *Nat Clin Pract Urol* 2009;6(2):76-85. doi: 10.1038/ncpuro1296
7. Owen PJ, Daly RM, Livingston PM, et al. Lifestyle guidelines for managing adverse

- 1  
2  
3  
4 effects on bone health and body composition in men treated with androgen  
5  
6  
7 deprivation therapy for prostate cancer: an update. *Prostate Cancer Prostatic*  
8  
9  
10 *Dis* 2017;20(2):137-45. doi: 10.1038/pcan.2016.69  
11  
12  
13  
14 8. Nguyen PL, Alibhai SM, Basaria S, et al. Adverse effects of androgen deprivation  
15  
16 therapy and strategies to mitigate them. *Eur Urol* 2015;67(5):825-36. doi:  
17  
18 10.1016/j.eururo.2014.07.010  
19  
20  
21  
22  
23 9. Basaria S, Muller DC, Carducci MA, et al. Hyperglycemia and insulin resistance in  
24  
25 men with prostate carcinoma who receive androgen-deprivation therapy. *Cancer*  
26  
27 2006;106(3):581-8. doi: 10.1002/cncr.21642  
28  
29  
30  
31  
32 10. Grossmann M, Hamilton EJ, Gilfillan C, et al. Bone and metabolic health in patients  
33  
34 with non-metastatic prostate cancer who are receiving androgen deprivation  
35  
36 therapy. *Med J Aust* 2011;194(6):301-6.  
37  
38  
39  
40  
41 11. Sharifi N, Gulley JL, Dahut WL. Androgen deprivation therapy for prostate cancer.  
42  
43 *JAMA* 2005;294(2):238-44. doi: 10.1001/jama.294.2.238  
44  
45  
46  
47 12. Wu FJ, Sheu SY, Lin HC, et al. Increased Fall Risk in Patients Receiving Androgen  
48  
49 Deprivation Therapy for Prostate Cancer. *Urology* 2016;95:145-50. doi:  
50  
51 10.1016/j.urology.2016.05.058  
52  
53  
54  
55  
56 13. Johnson-Wimbley TD, Graham DY. Diagnosis and management of iron deficiency  
57  
58 anemia in the 21st century. *Therap Adv Gastroenterol* 2011;4(3):177-84. doi:  
59  
60

1  
2  
3  
4  
5 10.1177/1756283X11398736  
6  
7

- 8 14. Caro JJ, Salas M, Ward A, et al. Anemia as an independent prognostic factor for  
9  
10 survival in patients with cancer: a systemic, quantitative review. *Cancer*  
11  
12 2001;91(12):2214-21.  
13  
14  
15  
16 15. Dicato M, Plawny L, Diederich M. Anemia in cancer. *Ann Oncol* 2010;21 Suppl  
17  
18 7:vii167-72. doi: 10.1093/annonc/mdq284  
19  
20  
21  
22 16. Dueregger A, Heidegger I, Ofer P, et al. The use of dietary supplements to alleviate  
23  
24 androgen deprivation therapy side effects during prostate cancer treatment.  
25  
26 *Nutrients* 2014;6(10):4491-519. doi: 10.3390/nu6104491  
27  
28  
29  
30  
31 17. Lopez A, Cacoub P, Macdougall IC, et al. Iron deficiency anaemia. *Lancet*  
32  
33 2016;387(10021):907-16. doi: 10.1016/s0140-6736(15)60865-0  
34  
35  
36  
37 18. Ferrucci L, Maggio M, Bandinelli S, et al. Low testosterone levels and the risk of  
38  
39 anemia in older men and women. *Arch Intern Med* 2006;166(13):1380-8. doi:  
40  
41 10.1001/archinte.166.13.1380  
42  
43  
44  
45  
46 19. Bachman E, Feng R, Travison T, et al. Testosterone suppresses hepcidin in men: a  
47  
48 potential mechanism for testosterone-induced erythrocytosis. *J Clin Endocrinol*  
49  
50 *Metab* 2010;95(10):4743-7. doi: 10.1210/jc.2010-0864  
51  
52  
53  
54  
55 20. Latour C, Kautz L, Besson-Fournier C, et al. Testosterone perturbs systemic iron  
56  
57 balance through activation of epidermal growth factor receptor signaling in the  
58  
59  
60

- 1  
2  
3  
4  
5 liver and repression of hepcidin. *Hepatology* 2014;59(2):683-94. doi:  
6  
7  
8 10.1002/hep.26648  
9
- 10  
11 21. Moriyama Y, Fisher JW. Effects of testosterone and erythropoietin on erythroid  
12  
13 colony formation in human bone marrow cultures. *Blood* 1975;45(5):665-70.  
14  
15
- 16  
17 22. D'Amico AV, Saegaert T, Chen MH, et al. Initial decline in hemoglobin during  
18  
19 neoadjuvant hormonal therapy predicts for early prostate specific antigen failure  
20  
21 following radiation and hormonal therapy for patients with intermediate and  
22  
23 high-risk prostate cancer. *Cancer* 2002;95(2):275-80. doi: 10.1002/cncr.10673  
24  
25  
26  
27
- 28  
29 23. Timilshina N, Hussain S, Breunis H, et al. Predictors of hemoglobin decline in non-  
30  
31 metastatic prostate cancer patients on androgen deprivation therapy: a matched  
32  
33 cohort study. *Support Care Cancer* 2011;19(11):1815-21. doi: 10.1007/s00520-  
34  
35  
36  
37 010-1023-6  
38  
39
- 40  
41 24. Hicks BM, Klil-Drori AJ, Yin H, et al. Androgen Deprivation Therapy and the Risk  
42  
43 of Anemia in Men with Prostate Cancer. *Epidemiology* 2017;28(5):712-18. doi:  
44  
45  
46  
47 10.1097/ede.0000000000000678  
48  
49
- 50  
51 25. Rebbeck TR. Prostate Cancer Genetics: Variation by Race, Ethnicity, and  
52  
53 Geography. *Semin Radiat Oncol* 2017;27(1):3-10. doi:  
54  
55  
56 10.1016/j.semradonc.2016.08.002  
57  
58
- 59  
60 26. Taitt HE. Global Trends and Prostate Cancer: A Review of Incidence, Detection,

- 1  
2  
3  
4  
5 and Mortality as Influenced by Race, Ethnicity, and Geographic Location.  
6  
7  
8 *American journal of men's health* 2018;12(6):1807-23. doi:  
9  
10 10.1177/1557988318798279  
11  
12  
13  
14 27. McLean E, Cogswell M, Egli I, et al. Worldwide prevalence of anaemia, WHO  
15  
16 Vitamin and Mineral Nutrition Information System, 1993-2005. *Public Health*  
17  
18 *Nutr* 2009;12(4):444-54. doi: 10.1017/s1368980008002401  
19  
20  
21  
22  
23 28. Poon DMC, Chan T, Chan K, et al. Preliminary efficacy and tolerability of  
24  
25 chemohormonal therapy in metastatic hormone-naive prostate cancer: The first  
26  
27 real-life experience in Asia. *Asia Pac J Clin Oncol* 2018;14(4):347-52. doi:  
28  
29 10.1111/ajco.12874  
30  
31  
32  
33  
34  
35 29. Liu CY, Hung YT, Chuang YL, et al. Incorporating development stratification of  
36  
37 Taiwan townships into sampling design of large scale health interview survey. *J*  
38  
39 *Health Manag* 2006;4(1):1-22.  
40  
41  
42  
43  
44 30. Strum SB, McDermed JE, Scholz MC, et al. Anaemia associated with androgen  
45  
46 deprivation in patients with prostate cancer receiving combined hormone  
47  
48 blockade. *Br J Urol* 1997;79(6):933-41. doi: 10.1046/j.1464-410x.1997.00234.x  
49  
50  
51  
52  
53 31. Choo R, Chander S, Danjoux C, et al. How are hemoglobin levels affected by  
54  
55 androgen deprivation in non-metastatic prostate cancer patients? *The Canadian*  
56  
57 *journal of urology* 2005;12(1):2547-52.  
58  
59  
60

- 1  
2  
3  
4  
5 32. Shahani S, Braga-Basaria M, Maggio M, et al. Androgens and erythropoiesis: past  
6  
7 and present. *J Endocrinol Invest* 2009;32(8):704-16. doi: 10.1007/bf03345745  
8  
9
- 10 33. Dai D, Han S, Li L, et al. Anemia is associated with poor outcomes of metastatic  
11  
12 castration-resistant prostate cancer, a systematic review and meta-analysis.  
13  
14 *American journal of translational research* 2018;10(12):3877-86.  
15  
16  
17  
18  
19
- 20 34. Pan X, Suzuki N, Hirano I, et al. Isolation and characterization of renal  
21  
22 erythropoietin-producing cells from genetically produced anemia mice. *PLoS*  
23  
24 *One* 2011;6(10):e25839. doi: 10.1371/journal.pone.0025839  
25  
26  
27  
28
- 29 35. Mirand EA, Gordon AS, Wenig J. Mechanism of testosterone action in  
30  
31 erythropoiesis. *Nature* 1965;206(981):270-2. doi: 10.1038/206270a0  
32  
33  
34
- 35 36. Guo W, Li M, Bhasin S. Testosterone supplementation improves anemia in aging  
36  
37 male mice. *J Gerontol A Biol Sci Med Sci* 2014;69(5):505-13. doi:  
38  
39 10.1093/gerona/glt127  
40  
41  
42  
43
- 44 37. Guo W, Bachman E, Li M, et al. Testosterone administration inhibits hepcidin  
45  
46 transcription and is associated with increased iron incorporation into red blood  
47  
48 cells. *Aging cell* 2013;12(2):280-91. doi: 10.1111/accel.12052  
49  
50  
51  
52  
53  
54  
55  
56  
57  
58  
59  
60



1  
2  
3  
4 **Figure Legend**  
5

6  
7 **Figure 1** Kaplan–Meier curve of the risk of iron-deficiency anaemia (IDA) among  
8  
9  
10 patients with prostate cancer during a 3-year follow-up period as stratified by the  
11  
12  
13 previous use or non-use of androgen deprivation therapy (ADT).  
14  
15  
16  
17  
18  
19  
20  
21  
22  
23  
24  
25  
26  
27  
28  
29  
30  
31  
32  
33  
34  
35  
36  
37  
38  
39  
40  
41  
42  
43  
44  
45  
46  
47  
48  
49  
50  
51  
52  
53  
54  
55  
56  
57  
58  
59  
60

For peer review only

**Table 1** Demographic characteristics of patients with prostate cancer stratified by the previous use or non-use of androgen deprivation therapy (ADT) ( $n = 12,711$ )

| Characteristic             | Patients not receiving ADT ( $n = 4237$ ) |          | Patients receiving ADT ( $n = 8474$ ) |          | <i>p</i> value |
|----------------------------|-------------------------------------------|----------|---------------------------------------|----------|----------------|
|                            | Total no.                                 | Column % | Total no.                             | Column % |                |
| Age (years), mean (SD)     | 70.99 (8.65)                              |          | 71.03 (8.59)                          |          | 0.7971         |
| Urbanisation level         |                                           |          |                                       |          | 0.9921         |
| 1 (most urbanised)         | 1168                                      | 27.57    | 2326                                  | 27.45    |                |
| 2                          | 990                                       | 23.37    | 1985                                  | 23.42    |                |
| 3                          | 584                                       | 13.78    | 1163                                  | 13.72    |                |
| 4                          | 537                                       | 12.67    | 1056                                  | 12.46    |                |
| 5 (least urbanised)        | 958                                       | 22.61    | 1944                                  | 22.94    |                |
| Geographic region          |                                           |          |                                       |          | 0.9757         |
| Northern                   | 2255                                      | 53.22    | 4500                                  | 53.10    |                |
| Central                    | 994                                       | 23.46    | 1969                                  | 23.24    |                |
| Southern                   | 948                                       | 22.37    | 1923                                  | 22.69    |                |
| Eastern                    | 40                                        | 0.94     | 82                                    | 0.97     |                |
| Monthly income             |                                           |          |                                       |          | 0.5705         |
| NT\$0–15,840               | 2840                                      | 67.03    | 5741                                  | 67.75    |                |
| NT\$15,841–25,000          | 1036                                      | 24.45    | 2053                                  | 24.23    |                |
| $\geq$ NT\$25,001          | 361                                       | 8.52     | 680                                   | 8.02     |                |
| Hypertension               | 2338                                      | 55.18    | 4820                                  | 56.88    | 0.0686         |
| Hyperlipidemia             | 894                                       | 21.10    | 1705                                  | 20.12    | 0.1968         |
| Diabetes                   | 911                                       | 21.50    | 1790                                  | 21.1     | 0.6237         |
| Coronary heart disease     | 952                                       | 22.47    | 1802                                  | 21.27    | 0.1205         |
| Inflammatory bowel disease | 37                                        | 0.87     | 70                                    | 0.83     | 0.7836         |
| Gastrointestinal bleeding  | 116                                       | 2.74     | 216                                   | 2.55     | 0.5292         |
| Previous cancers           | 258                                       | 6.09     | 490                                   | 5.78     | 0.4884         |

*Notes:* The average exchange rate in 2015 was US\$1.00  $\approx$  New Taiwan (NT)\$30.

**Table 2** Crude and adjusted hazard ratios (HRs) for anaemia among patients with prostate cancer during a 3-year follow-up period stratified by the previous use or non-use of androgen deprivation therapy (ADT)

| Presence of iron-deficiency anaemia          | Total sample<br>( <i>n</i> = 12,711) | Patients receiving ADT<br>( <i>n</i> = 8474) | Patients not receiving ADT<br>( <i>n</i> = 4237) |
|----------------------------------------------|--------------------------------------|----------------------------------------------|--------------------------------------------------|
| Three-year follow-up period                  |                                      |                                              |                                                  |
| Incidence rate per 100 person-years (95% CI) | 1.17 (1.05–1.29)                     | 1.35 (1.20–1.51)                             | 0.83 (0.67–1.01)                                 |
| Crude HR (95% CI)                            | --                                   | 1.62 (1.29–2.05)                             | 1.00                                             |
| Adjusted HR (95% CI) <sup>a,b</sup>          | --                                   | 1.61 (1.28–2.03)                             | 1.00                                             |
| Adjusted HR (95% CI) <sup>a,c</sup>          | --                                   | 1.61 (1.28–2.03)                             | 1.00                                             |

Notes: <sup>a</sup> Using a Cox proportional regression with data censored if individuals died during the 3-year follow-up period; <sup>b</sup> Adjustments were made for patients' geographic location, monthly income, urbanisation level, age and incidence of hyperlipidaemia, diabetes, hypertension, coronary heart disease and inflammatory bowel disease. <sup>c</sup> Adjustments were made for patients' geographic location, monthly income, urbanisation level, age and incidence of hyperlipidaemia, diabetes, hypertension, coronary heart disease, inflammatory bowel disease, other cancers and gastrointestinal bleeding.

CI, confidence interval

**Table 3** Crude and adjusted hazard ratios (HRs) for anaemia among patients with prostate cancer during a 3-year follow-up period stratified by the duration of androgen deprivation therapy (ADT)

| Presence of iron-deficiency anaemia          | Patients receiving long-term ADT (n =4239) <sup>d</sup> | Patients receiving short-term ADT (n =4235) <sup>d</sup> | Patients not receiving ADT (n = 4237) |
|----------------------------------------------|---------------------------------------------------------|----------------------------------------------------------|---------------------------------------|
| Three-year follow-up period                  |                                                         |                                                          |                                       |
| Incidence rate per 100 person-years (95% CI) | 1.41 (1.20–1.64)                                        | 1.27 (1.06–1.51)                                         | 0.83 (0.67–1.01)                      |
| Crude HR (95% CI)                            | 1.70 (1.32–2.19)                                        | 1.53 (1.17–2.00)                                         | 1.00                                  |
| Adjusted HR (95% CI) <sup>a,b</sup>          | 1.65 (1.28–2.13)                                        | 1.56 (1.20–2.04)                                         | 1.00                                  |
| Adjusted HR (95% CI) <sup>a,c</sup>          | 1.65 (1.28–2.13)                                        | 1.56 (1.19–2.04)                                         | 1.00                                  |

Notes: <sup>a</sup> Using a Cox proportional regression with data censored if individuals died during the 3-year follow-up period; <sup>b</sup> Adjustments were made for patients’ geographic location, monthly income, urbanisation level, age and incidence of hyperlipidemia, diabetes, hypertension, coronary heart disease and inflammatory bowel disease. <sup>c</sup> Adjustments were made for patients’ geographic location, monthly income, urbanisation level, age and incidence of hyperlipidaemia, diabetes, hypertension, coronary heart disease, inflammatory bowel disease, other cancers and gastrointestinal bleeding. <sup>d</sup> We categorised the patients receiving ADT into two levels according to the median duration of ADT use (353 days). CI, confidence interval

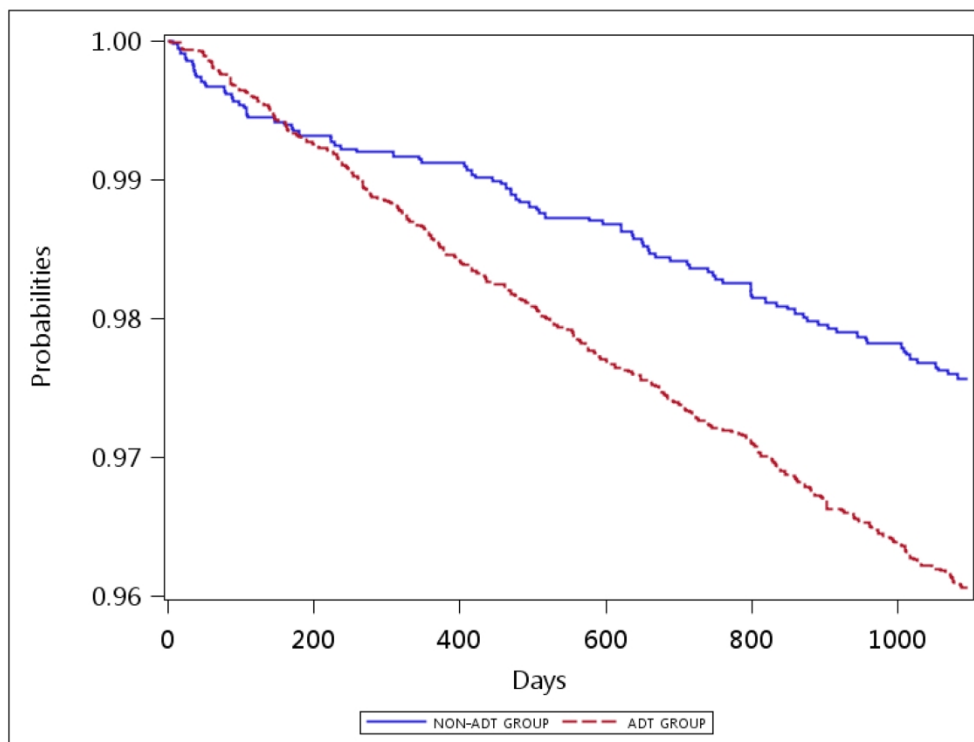

Figure 1 Kaplan–Meier curve of the risk of iron-deficiency anaemia (IDA) among patients with prostate cancer during a 3-year follow-up period as stratified by the previous use or non-use of androgen deprivation therapy (ADT).

199x150mm (500 x 500 DPI)

# BMJ Open

## Androgen Deprivation Therapy and the Risk of Iron-Deficiency Anaemia among Patients with Prostate Cancer: A Population-based Cohort Study

|                                 |                                                                                                                                                                                                                                                                                                                                                                                                                                                                                                                        |
|---------------------------------|------------------------------------------------------------------------------------------------------------------------------------------------------------------------------------------------------------------------------------------------------------------------------------------------------------------------------------------------------------------------------------------------------------------------------------------------------------------------------------------------------------------------|
| Journal:                        | <i>BMJ Open</i>                                                                                                                                                                                                                                                                                                                                                                                                                                                                                                        |
| Manuscript ID                   | bmjopen-2019-034202.R2                                                                                                                                                                                                                                                                                                                                                                                                                                                                                                 |
| Article Type:                   | Original research                                                                                                                                                                                                                                                                                                                                                                                                                                                                                                      |
| Date Submitted by the Author:   | 18-Feb-2020                                                                                                                                                                                                                                                                                                                                                                                                                                                                                                            |
| Complete List of Authors:       | Wu, Fang-Jen ; West Garden Hospital<br>Li, I-Hsun; Tri-Service General Hospital<br>Chien, Wu-Chien ; National Defense Medical Center<br>Shih, Jui-Hu; Tri-Service General Hospital, Department of Pharmacy Practice<br>Lin, Yi-Chun ; Research Center of Biostatistics, Taipei Medical University<br>Chuang, Chin-Min ; China Medical University Hospital<br>Cheng, Yih-Dih ; China Medical University Hospital, Department of Pharmacy<br>Kao, Li-Ting; Tri-Service General Hospital, Department of Pharmacy Practice |
| <b>Primary Subject Heading</b>: | Urology                                                                                                                                                                                                                                                                                                                                                                                                                                                                                                                |
| Secondary Subject Heading:      | Epidemiology, Pharmacology and therapeutics                                                                                                                                                                                                                                                                                                                                                                                                                                                                            |
| Keywords:                       | androgen deprivation therapy, iron-deficiency anemia, prostate cancer, anemia, drug safety                                                                                                                                                                                                                                                                                                                                                                                                                             |
|                                 |                                                                                                                                                                                                                                                                                                                                                                                                                                                                                                                        |

SCHOLARONE™  
Manuscripts

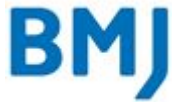

I, the Submitting Author has the right to grant and does grant on behalf of all authors of the Work (as defined in the below author licence), an exclusive licence and/or a non-exclusive licence for contributions from authors who are: i) UK Crown employees; ii) where BMJ has agreed a CC-BY licence shall apply, and/or iii) in accordance with the terms applicable for US Federal Government officers or employees acting as part of their official duties; on a worldwide, perpetual, irrevocable, royalty-free basis to BMJ Publishing Group Ltd ("BMJ") its licensees and where the relevant Journal is co-owned by BMJ to the co-owners of the Journal, to publish the Work in this journal and any other BMJ products and to exploit all rights, as set out in our [licence](#).

The Submitting Author accepts and understands that any supply made under these terms is made by BMJ to the Submitting Author unless you are acting as an employee on behalf of your employer or a postgraduate student of an affiliated institution which is paying any applicable article publishing charge ("APC") for Open Access articles. Where the Submitting Author wishes to make the Work available on an Open Access basis (and intends to pay the relevant APC), the terms of reuse of such Open Access shall be governed by a Creative Commons licence – details of these licences and which [Creative Commons](#) licence will apply to this Work are set out in our licence referred to above.

Other than as permitted in any relevant BMJ Author's Self Archiving Policies, I confirm this Work has not been accepted for publication elsewhere, is not being considered for publication elsewhere and does not duplicate material already published. I confirm all authors consent to publication of this Work and authorise the granting of this licence.

1  
2  
3  
4 **Androgen Deprivation Therapy and the Risk of Iron-Deficiency Anaemia**  
5  
6 **among Patients with Prostate Cancer: A Population-based Cohort Study**  
7

8 Fang-Jen Wu<sup>1</sup> I-Hsun Li<sup>2,3,4</sup> Wu-Chien Chien<sup>5,6,7</sup> Jui-Hu Shih<sup>2,3</sup>

9 Yi-Chun Lin<sup>8</sup> Chin-Min Chuang<sup>9</sup> Yih-Dih Cheng<sup>10\*</sup> Li-Ting Kao<sup>2,3,5,7\*</sup>  
10  
11  
12

13 <sup>1</sup> Department of Pharmacy, West Garden Hospital, Taipei, Taiwan

14 <sup>2</sup> Department of Pharmacy Practice, Tri-Service General Hospital, Taipei, Taiwan

15 <sup>3</sup> School of Pharmacy, National Defense Medical Center, Taipei, Taiwan

16 <sup>4</sup> Department of Pharmacology, National Defense Medical Center, Taipei, Taiwan

17 <sup>5</sup> Graduate Institute of Life Sciences, National Defense Medical Center, Taipei, Taiwan

18 <sup>6</sup> Department of Medical Research, Tri-Service General Hospital, National Defense  
19 Medical Center, Taipei, Taiwan.

20 <sup>7</sup> School of Public Health, National Defense Medical Center, Taipei, Taiwan.

21 <sup>8</sup> Research Center of Biostatistics, Taipei Medical University, Taipei, Taiwan.

22 <sup>9</sup> Emergency Department, China Medical University Hospital, Taichung City, Taiwan

23 <sup>10</sup> Department of Pharmacy, China Medical University Hospital, Taichung City, Taiwan

24  
25  
26  
27  
28 **Corresponding author:** Li-Ting Kao, Department of Pharmacy Practice, Tri-Service  
29 General Hospital, No.325, Sec.2, Chenggong Rd., Neihu District, Taipei City 11490,  
30 Taiwan. Tel: 886-2-8792-3311 ext. 17629, Fax: 886-2-8792-3171, E-mail:  
31 kaoliting@gmail.com  
32  
33  
34

35  
36  
37 \* Li-Ting Kao and Yih-Dih Cheng have equal contributions to this study  
38  
39

40 **Running title:** Androgen Deprivation Therapy and Iron-Deficiency Anaemia

41  
42 **Disclosure:** No conflict of financial interest to declare.

43  
44 **No funding source.**

45 **Word count for text:** 2213, **number of tables/figures:** 3/1, **number of references:** 37  
46  
47  
48  
49  
50  
51  
52  
53  
54  
55  
56  
57  
58  
59  
60



## Abstract

**Objectives:** The administration of androgen deprivation therapy (ADT) to patients with metastatic prostate cancer might be associated with some adverse effects such as anaemia; however, few studies have been performed in East Asian populations. This study aimed to investigate the association between ADT and iron-deficiency anaemia (IDA) among patients with prostate cancer in a population-based nationwide cohort.

**Design:** Cohort study.

**Setting:** Taiwan.

**Participants:** Data for the cohort study were retrieved from the Taiwan National Health Insurance Research Database. Propensity score matching was used to select 7,262 patients with prostate cancer who received ADT as the study group and 3,631 patients who did not receive ADT as the control group.

**Primary and secondary outcome measures:** This study individually tracked patients over a 3-year study period and identified those who were subsequently diagnosed with IDA following the index date.

**Results:** The incidence rates of IDA in the study and control groups were 1.66 (95% confidence interval [CI] = 1.45–1.86) and 1.01 per 100 person-years (95% CI = 0.78–1.25), respectively. Furthermore, proportional Cox regression revealed a hazard ratio

1  
2  
3  
4  
5 (HR) of 1.62 (95% CI = 1.24–2.12) for IDA in the study group after adjusting for  
6  
7  
8 patients' age, monthly income, geographic location, residential urbanisation level and  
9  
10  
11 incidence of hyperlipidemia, diabetes, hypertension, coronary heart disease,  
12  
13  
14 inflammatory bowel disease, other cancers and gastrointestinal bleeding.  
15  
16

17  
18 **Conclusion:** Compared with its non-use among patients with prostate cancer, ADT use  
19  
20 was associated with a higher risk of IDA.  
21  
22  
23  
24  
25  
26  
27  
28

29 **Key words:** androgen deprivation therapy, iron-deficiency anaemia, prostate cancer,  
30  
31 anaemia, drug safety  
32  
33  
34  
35  
36  
37  
38  
39  
40  
41  
42  
43  
44  
45  
46  
47  
48  
49  
50  
51  
52  
53  
54  
55  
56  
57  
58  
59  
60

### Strengths and limitations of this study

1. Data for this cohort study were retrieved from a large Asian population-based dataset in Taiwan.
2. This study used a propensity score matching strategy to eliminate potential biases such as patients' demographics and comorbidities between the study and control cohorts.
3. The sample size and statistical power were sufficient in this study.
4. Selection bias may have been eliminated by the use of a population-based dataset.
5. Information on personal history and lifestyle was unavailable when data were retrieved.

**Funding source:** This research received no specific grant from any funding agency in the public, commercial or not-for-profit sectors

**Competing interests:** None declared.

## INTRODUCTION

Prostate cancer (PCa) is the leading cause of cancer in males, and it accounted for 293,000 deaths globally in 2013.<sup>1 2</sup> In 2018, an estimated 164,690 new diagnoses in males and 29,430 deaths from the disease were reported in the United States.<sup>3</sup> Androgen deprivation therapy (ADT), also known as hormone therapy, has been a fundamental component of metastatic PCa management for more than half a century.<sup>4</sup> This therapy can improve long-term survival for many patients.<sup>5 6</sup> However, the decreased serum levels of endogenous androgen associated with ADT might result in some adverse effects, including decreased muscle mass, increased insulin resistance and fall risk, among patients with PCa.<sup>7-12</sup>

Iron-deficiency anaemia (IDA) is a common disease that affects approximately 5% of females and 2% of males in the United States.<sup>13</sup> Increasing numbers of studies have recognised that anaemia may have a potentially detrimental impact on the quality of life and survival of patients with PCa.<sup>14-17</sup> A previous study (InCHIANTI study) further suggested that androgen deficiency contributes to the development of anaemia in men with PCa.<sup>18</sup> Some studies proposed that androgens may stimulate erythropoiesis through direct effects on erythroid progenitor cells and indirect inhibitory effects on hepcidin.<sup>19-</sup>  
<sup>21</sup> Therefore, it is plausible that ADT may be associated with the incidence of IDA.

1  
2  
3  
4  
5 Accordingly, the association between ADT and anaemia has been reported in  
6  
7 several Western studies using Caucasian populations.<sup>22-24</sup> However, to date, few studies  
8  
9 have been conducted in East Asian populations even though the hereditary risk of PCa  
10  
11 substantially varies by ethnicity and geography.<sup>25 26</sup> In addition, the haemoglobin  
12  
13 concentration, which is a critical indicator of anaemia, is recognised to vary by  
14  
15 race/ethnicity, lifestyle, demographics and other variables.<sup>27</sup> Furthermore, a recent study  
16  
17 of 32 patients receiving ADT demonstrated that haematologic toxicities such as anaemia  
18  
19 were more frequent in Chinese patients with PCa than in their Western counterparts.<sup>28</sup>  
20  
21 Consequently, this study examined whether ADT is associated with a subsequent risk  
22  
23 of anaemia in patients with PCa by employing a propensity score matching strategy  
24  
25 using an Asian population-based dataset in Taiwan.  
26  
27  
28  
29  
30  
31  
32  
33  
34  
35  
36  
37  
38  
39  
40  
41  
42  
43  
44  
45  
46  
47  
48  
49  
50  
51  
52  
53  
54  
55  
56  
57  
58  
59  
60

## **METHODS**

### **Database**

Data for the retrospective cohort study were retrieved from the Taiwan National Health Insurance Research Database (NHIRD). The NHIRD, which derived from the Taiwan Bureau of National Health Insurance, consists of inpatient and ambulatory medical benefit claims from approximately 22 million enrollees, representing more than 99% of Taiwan's population. Therefore, this database provides scientists in Taiwan with an exclusive opportunity to analyse and track medical service use by enrollees since the beginning of the Taiwan National Health Insurance programme in 1995. This study was exempt from full revision by the Tri-Service General Hospital Institutional Review Board (TSGHIRB No. 2-105-05-082) because the dataset used was blinded to the public for research purposes.

### **Study Sample**

This cohort study included study and control groups. For the study group, 28,367 patients who received a first-time diagnosis of PCa (ICD-9-CM code 185) between January 1, 2001 and December 31, 2010 were selected from the Registry of Catastrophic Illness Patient Database in NHIRD. In total, 454 patients younger than 40 years were excluded because the prevalence of PCa is extremely low in this age strata. The date of ADT administration (including gonadotropin-releasing hormone agonists, anti-

1  
2  
3  
4  
5 androgens, ketoconazole and estrogens; ATC codes L02AE03, L02AE02, L02AE04,  
6  
7 L02BB03, G03HA01, L02BB01, J02AB02 and L02AA) was assigned as the index date  
8  
9  
10 for patients with PCa who subsequently received ADT treatment. Furthermore, the date  
11  
12  
13 of a randomly selected outpatient visit was assigned as the index date for the diagnosis  
14  
15  
16 of PCa for patients who did not receive ADT. Meanwhile, 1,605 patients who had  
17  
18  
19 received a diagnosis of IDA (ICD-9-CM codes 280, 280.0, 280.1, 280.8 and 280.9) and  
20  
21  
22 1,533 patients who had undergone orchiectomy prior to their index date were excluded.  
23  
24  
25 As a result, 24,775 patients with PCa remained in the study, including 20,272 and 4,503  
26  
27  
28 patients with ADT use and non-use, respectively, during the 3-year study period.  
29  
30  
31 Specifically, 44.06, 26.06, 14.65, and 15.23% of the ADT prescriptions were for  
32  
33  
34 cyproterone, bicalutamide, flutamide and other types of medications, respectively. The  
35  
36  
37 average time from PCa diagnosis date to patient entry date for both non-users and users  
38  
39  
40 were 758.4 days and 796.9 days, respectively.  
41  
42  
43

44 Propensity score matching was used to identify 7,262 patients with PCa who  
45  
46  
47 received ADT. This methodology could eliminate the differences attributable to  
48  
49  
50 differences in patient demographics and medical history between the groups. We used  
51  
52  
53 propensity score matching using the Mahalanobis metric (caliper of 0.25 standard  
54  
55  
56 deviations of the propensity score). The matching variables included year of the entry  
57  
58  
59 date, age, monthly income, geographic location, residential urbanisation level (divided  
60

1  
2  
3  
4 into five levels, with 1 being the most urbanised and 5 being the least urbanised),<sup>29</sup>  
5  
6  
7  
8 hyperlipidaemia, diabetes, hypertension, coronary heart disease and inflammatory  
9  
10  
11 bowel disease. We performed a 2:1 matching study, because increasing sample size of  
12  
13  
14 cases or controls could increase the statistic power of the findings. Ultimately, 10,893  
15  
16  
17 patients were enrolled in this study, including 7,262 who received ADT and 3,631 who  
18  
19  
20 did not receive ADT. We categorised the patients receiving ADT into two levels  
21  
22  
23 according to the median duration of ADT use (median = 144 days). Those patients who  
24  
25  
26 received ADT <144 days were identified as short-term ADT users. Moreover, patients  
27  
28  
29 receiving ADT  $\geq$  144 days were defined as long-term ADT users. The power for this  
30  
31  
32 study was adequate (power > 0.9). Each patient was subsequently followed individually  
33  
34  
35 for a 3-year period to identify those who received an IDA diagnosis following the index  
36  
37  
38 date.

### 41 **Statistical Analysis**

42  
43  
44 All statistical analyses were performed using the SAS System for Windows (ver.  
45  
46  
47 9.4, SAS Institute). Chi-squared tests were used to investigate differences in  
48  
49  
50 sociodemographic characteristics and medical comorbidities between the study and  
51  
52  
53 control groups. Additionally, Cox proportional hazard regression analysis was  
54  
55  
56 conducted to examine the relationship between ADT use and IDA risk during the 3-year  
57  
58  
59 study period. Data for patients who died or who were lost to follow-up during the study  
60



1  
2  
3  
4  
5 period were censored in the Cox regression. In total, 3,152 patients died during the 3-  
6  
7  
8 year study period (2,153 ADT users and 999 non-users). A two-sided  $p$  value  $< 0.05$   
9  
10 denoted statistical significance.  
11  
12  
13

#### 14 **Patient and Public Involvement**

15  
16  
17 Patients and the public were not involved in the development of the research  
18  
19 question, outcome measures, study design and recruitment/conduct of the present  
20  
21 study.  
22  
23  
24  
25  
26  
27  
28  
29  
30  
31  
32  
33  
34  
35  
36  
37  
38  
39  
40  
41  
42  
43  
44  
45  
46  
47  
48  
49  
50  
51  
52  
53  
54  
55  
56  
57  
58  
59  
60

## RESULTS

Data for patients' sociodemographic characteristics and medical comorbidities are shown in Table 1. No statistically significant differences were found regarding age, monthly income, geographic location, residential urbanisation level and the incidence of hyperlipidaemia, diabetes, hypertension, coronary heart disease and inflammatory bowel disease between the study and control groups.

The incidence of IDA during the 3-year study period is presented in Table 2. The IDA incidence rate per 100 person-years for the entire 10,893-patient cohort was 1.45 (95% confidence interval [CI] = 1.29–1.61). The incidence rates per 100 person-years for the study and control groups were 1.66 (95% CI = 1.45–1.86) and 1.01 (95% CI = 0.78–1.25), respectively. The log-rank test revealed that the study group had a significantly lower 3-year IDA-free survival rate than the control group ( $p < 0.001$ , Figure 1).

Table 2 further illustrates that the hazard ratio (HR) for IDA in the study group relative to the findings in the control group was 1.64 (95% CI = 1.25–2.14;  $p \leq 0.001$ ). After adjusting for patients' age, monthly income, geographic location, residential urbanisation level and the incidence of hyperlipidemia, diabetes, hypertension, coronary heart disease, inflammatory bowel disease, other cancers and gastrointestinal

1  
2  
3  
4  
5 bleeding, the HR for the study group compared with the control group was 1.62 (95%  
6  
7  
8 CI = 1.24–2.12;  $p \leq 0.001$ ). This study further classified patients in the study group as  
9  
10 short-term and long-term ADT users based on the median duration of use. Compared  
11  
12  
13 with the findings in the control group, the adjusted HRs for short-term ADT use in the  
14  
15  
16 study group were 2.06 (95% CI = 1.53–2.76) (Table 3). Furthermore, sensitivity  
17  
18  
19 analyses were displayed in Supplementary Table 1 and Supplementary Table 2.  
20  
21  
22  
23  
24  
25  
26  
27  
28  
29  
30  
31  
32  
33  
34  
35  
36  
37  
38  
39  
40  
41  
42  
43  
44  
45  
46  
47  
48  
49  
50  
51  
52  
53  
54  
55  
56  
57  
58  
59  
60

## DISCUSSION

To the best of our knowledge, this is the first study to investigate the relationship between ADT use in men with PCa and the 3-year IDA risk in an East Asian population. This study only included patients with PCa in the relevant analyses to avoid the potential effects attributable to cancer. To mitigate selection bias, a propensity score matching strategy (by year of the entry date, age, monthly income, geographical location, residential urbanisation level and medical comorbidities) was used to facilitate comparisons with patients with PCa who did not receive ADT. In this population-based retrospective cohort study of patients with PCa, a significant increase in IDA risk was observed with men treated with ADT.

The findings were consistent with those of prior Western studies. For instance, in the United States, Strum et al. demonstrated that the haemoglobin levels of patients who received ADT for PCa declined from a mean of 149 g/L at baseline to 139, 132 and 131 g/L after 1, 2 and 3 months, respectively.<sup>30</sup> In Canada, Timilshina et al. performed an observational study of 250 patients with non-metastatic PCa and found that ADT was independently associated with a reduction of haemoglobin levels over 12 months.<sup>23</sup> Among 110 patients with PCa who received ADT, one cohort study reported a decline in haemoglobin levels from 14.8 g/dL at baseline to 12.9 g/dL at evaluation.<sup>22</sup> Another study of 72 patients with non-metastatic PCa who received adjuvant radiotherapy plus

1  
2  
3  
4  
5 ADT reported that the haemoglobin level had significant declined after 2 years of  
6  
7  
8 androgen suppression.<sup>31</sup> All of these studies investigated the association of ADT with  
9  
10  
11 haemoglobin levels, which is vital given that haemoglobin levels are important for  
12  
13  
14 identifying anaemia. However, these clinical studies included small sample sizes and  
15  
16  
17 featured a short duration.<sup>22 23 30 31</sup> Separately, Hicks et al. performed a cohort study using  
18  
19  
20 the United Kingdom Clinical Practice Research Database linked to the Hospital Episode  
21  
22  
23 Statistics repository. Their findings revealed that patients with non-metastatic PCa who  
24  
25  
26 received ADT had a nearly 3-fold greater risk of anaemia than non-users (HR = 2.90,  
27  
28  
29 95% CI = 2.67–3.16).<sup>24</sup> However, this study was performed in a Western population,  
30  
31  
32 and generalisation of its findings to other ethnic groups is not possible.

33  
34  
35 Our study examined the association between ADT and the 3-year IDA risk among  
36  
37  
38 patients with PCa; however, the risk of anaemia caused by ADT use has remained  
39  
40  
41 unclear. To date, increasing biological evidence has suggested a potential connection  
42  
43  
44 between the receipt of ADT and subsequent IDA risk.<sup>32</sup> A possible explanation for the  
45  
46  
47 underlying mechanism may be that androgen significantly increases the levels of bone  
48  
49  
50 marrow erythroid precursors and enhances the differentiation of bone marrow erythroid  
51  
52  
53 stem cells to erythrocytes.<sup>21 33</sup> Furthermore, testosterone might influence erythropoietin  
54  
55  
56 secretion via peritubular fibroblast-like cells in the kidneys.<sup>34</sup> In animal experiments,  
57  
58  
59 testosterone induced erythropoiesis-stimulating factor production in a bioassay using a  
60

1  
2  
3  
4  
5 mouse model of polycythaemia vera.<sup>35</sup> Guo et al. found that sensitivity to erythropoietin  
6  
7  
8 was induced and stress erythropoiesis was increased by testosterone, which upregulated  
9  
10  
11 the expression of GATA binding protein 1 and GATA-dependent genes, in a study of  
12  
13  
14 ageing male mice.<sup>36</sup> In addition, Bachman et al. observed that treatment with  
15  
16  
17 testosterone in men was related to serum hepcidin suppression in a randomised double-  
18  
19  
20 blind clinical study.<sup>19</sup> Testosterone directly interacts with the bone morphogenetic  
21  
22  
23 protein-Smad signalling pathway in hepatocytes and induces the downregulation of  
24  
25  
26 hepcidin transcription.<sup>37</sup> Furthermore, these effects of androgen on hepatic hepcidin and  
27  
28  
29 renal erythropoietin gene expression could increase systemic iron transport and  
30  
31  
32 erythropoietin levels.<sup>37</sup>

33  
34  
35 The strengths of our study included the identification of the association between  
36  
37  
38 ADT use in patients with PCa and subsequent IDA risk using a large population-based  
39  
40  
41 database. The Taiwan NHIRD provides high accessibility to medical service data and  
42  
43  
44 adequate to detect IDA risk between the study and control groups. Moreover, the  
45  
46  
47 sociodemographic characteristics and medical comorbidities of patients with PCa were  
48  
49  
50 acknowledged as risk factors. Furthermore, we also used a propensity score matching  
51  
52  
53 strategy to eliminate potential biases such as patients' demographics and comorbidities  
54  
55  
56 between the study and control cohorts.

57  
58  
59 Several limitations of our retrospective study should be addressed. The study  
60

1  
2  
3  
4  
5 lacked information on potentially important patient characteristics, such as body mass  
6  
7  
8 index, smoking, nutrition and non-prescription medication use. Second, it is plausible  
9  
10  
11 that the database did not include all patients with PCa and IDA in Taiwan because some  
12  
13  
14 patients might have sought alternative medicines not recorded by the NHI programme  
15  
16  
17 and some patients with mild or normocytic anaemia may not have immediately sought  
18  
19  
20 medical treatment. Therefore, these patients might not have been captured via diagnosis  
21  
22  
23 codes. Third, information on the family history of anaemia, cancer stage and grade for  
24  
25  
26 the presence of metastases, chemotherapy, radiotherapy and surgery was unavailable  
27  
28  
29 this study. Finally, this study lacked information regarding blood variables.  
30  
31  
32 Nevertheless, this study identified patients with PCa who used ADT as cases and  
33  
34  
35 patients with PCa patients who did not use ADT as controls. In general, physicians in  
36  
37  
38 Taiwan perform complete blood counts for patients with PCa to identify suitable  
39  
40  
41 treatments. Consequently, we considered that these factors may not have affected the  
42  
43  
44 findings in this study.

## 45 46 47 **CONCLUSIONS**

48  
49  
50  
51 In conclusion, the present study detected an increased IDA risk during a 3-year  
52  
53  
54 follow-up period among patients with PCa who received ADT. Medical professionals  
55  
56  
57 are recommended to be aware of the risk of anaemia following ADT. Clinicians and  
58  
59  
60 pharmacists need to consider the possible risk of IDA among patients with PCa who

1  
2  
3  
4  
5 received ADT and assess the efficacy of preventative and treatment modalities for  
6  
7  
8 anaemia.  
9  
10  
11  
12  
13  
14  
15  
16  
17  
18  
19  
20  
21  
22  
23  
24  
25  
26  
27  
28  
29  
30  
31  
32  
33  
34  
35  
36  
37  
38  
39  
40  
41  
42  
43  
44  
45  
46  
47  
48  
49  
50  
51  
52  
53  
54  
55  
56  
57  
58  
59  
60

For peer review only



## Contributors

Conceptualisation: Fang-Jen Wu, Yih-Dih Cheng, I-Hsun Li and Li-Ting Kao;

Methodology: Fang-Jen Wu, Yih-Dih Cheng, Yi-Chun Lin, and Li-Ting Kao; Formal

analysis and investigation: Fang-Jen Wu and Wu-Chien Chien; Writing - original draft

preparation: Fang-Jen Wu, Jui-Hu Shih, Chin-Min Chuang and Yih-Dih Cheng

## Ethics approval

This study was exempt from full revision by the Tri-Service General Hospital

Institutional Review Board (TSGHIRB No. 2-105-05-082) because the dataset used was

blinded to the public for research purposes.

## Data sharing statement

No additional data available.

**REFERENCES**

1. Fitzmaurice C, Dicker D, Pain A, et al. The Global Burden of Cancer 2013. *JAMA oncology* 2015;1(4):505-27. doi: 10.1001/jamaoncol.2015.0735
2. Attard G, Parker C, Eeles RA, et al. Prostate cancer. *Lancet* 2016;387(10013):70-82. doi: 10.1016/S0140-6736(14)61947-4
3. Siegel RL, Miller KD, Jemal A. Cancer statistics, 2018. *CA Cancer J Clin* 2018;68(1):7-30. doi: 10.3322/caac.21442
4. Shahinian VB, Kuo YF, Gilbert SM. Reimbursement policy and androgen-deprivation therapy for prostate cancer. *N Engl J Med* 2010;363(19):1822-32. doi: 10.1056/NEJMsa0910784
5. Bryant AK, D'Amico AV, Nguyen PL, et al. Three-month posttreatment prostate-specific antigen level as a biomarker of treatment response in patients with intermediate-risk or high-risk prostate cancer treated with androgen deprivation therapy and radiotherapy. *Cancer* 2018;124(14):2939-47. doi: 10.1002/cncr.31400
6. Harris WP, Mostaghel EA, Nelson PS, et al. Androgen deprivation therapy: progress in understanding mechanisms of resistance and optimizing androgen depletion. *Nat Clin Pract Urol* 2009;6(2):76-85. doi: 10.1038/ncpuro1296
7. Owen PJ, Daly RM, Livingston PM, et al. Lifestyle guidelines for managing adverse

- 1  
2  
3  
4 effects on bone health and body composition in men treated with androgen  
5  
6  
7 deprivation therapy for prostate cancer: an update. *Prostate Cancer Prostatic*  
8  
9  
10 *Dis* 2017;20(2):137-45. doi: 10.1038/pcan.2016.69  
11  
12  
13  
14 8. Nguyen PL, Alibhai SM, Basaria S, et al. Adverse effects of androgen deprivation  
15  
16 therapy and strategies to mitigate them. *Eur Urol* 2015;67(5):825-36. doi:  
17  
18 10.1016/j.eururo.2014.07.010  
19  
20  
21  
22  
23 9. Basaria S, Muller DC, Carducci MA, et al. Hyperglycemia and insulin resistance in  
24  
25 men with prostate carcinoma who receive androgen-deprivation therapy. *Cancer*  
26  
27 2006;106(3):581-8. doi: 10.1002/cncr.21642  
28  
29  
30  
31  
32 10. Grossmann M, Hamilton EJ, Gilfillan C, et al. Bone and metabolic health in patients  
33  
34 with non-metastatic prostate cancer who are receiving androgen deprivation  
35  
36 therapy. *Med J Aust* 2011;194(6):301-6.  
37  
38  
39  
40  
41 11. Sharifi N, Gulley JL, Dahut WL. Androgen deprivation therapy for prostate cancer.  
42  
43 *JAMA* 2005;294(2):238-44. doi: 10.1001/jama.294.2.238  
44  
45  
46  
47 12. Wu FJ, Sheu SY, Lin HC, et al. Increased Fall Risk in Patients Receiving Androgen  
48  
49 Deprivation Therapy for Prostate Cancer. *Urology* 2016;95:145-50. doi:  
50  
51 10.1016/j.urology.2016.05.058  
52  
53  
54  
55  
56 13. Johnson-Wimbley TD, Graham DY. Diagnosis and management of iron deficiency  
57  
58 anemia in the 21st century. *Therap Adv Gastroenterol* 2011;4(3):177-84. doi:  
59  
60

1  
2  
3  
4  
5 10.1177/1756283X11398736  
6  
7

8 14. Caro JJ, Salas M, Ward A, et al. Anemia as an independent prognostic factor for  
9  
10 survival in patients with cancer: a systemic, quantitative review. *Cancer*  
11  
12 2001;91(12):2214-21.  
13  
14

15  
16 15. Dicato M, Plawny L, Diederich M. Anemia in cancer. *Ann Oncol* 2010;21 Suppl  
17  
18 7:vii167-72. doi: 10.1093/annonc/mdq284  
19  
20

21  
22 16. Dueregger A, Heidegger I, Ofer P, et al. The use of dietary supplements to alleviate  
23  
24 androgen deprivation therapy side effects during prostate cancer treatment.  
25  
26 *Nutrients* 2014;6(10):4491-519. doi: 10.3390/nu6104491  
27  
28

29  
30 17. Lopez A, Cacoub P, Macdougall IC, et al. Iron deficiency anaemia. *Lancet*  
31  
32 2016;387(10021):907-16. doi: 10.1016/s0140-6736(15)60865-0  
33  
34  
35

36  
37 18. Ferrucci L, Maggio M, Bandinelli S, et al. Low testosterone levels and the risk of  
38  
39 anemia in older men and women. *Arch Intern Med* 2006;166(13):1380-8. doi:  
40  
41 10.1001/archinte.166.13.1380  
42  
43  
44

45  
46 19. Bachman E, Feng R, Travison T, et al. Testosterone suppresses hepcidin in men: a  
47  
48 potential mechanism for testosterone-induced erythrocytosis. *J Clin Endocrinol*  
49  
50 *Metab* 2010;95(10):4743-7. doi: 10.1210/jc.2010-0864  
51  
52  
53

54  
55 20. Latour C, Kautz L, Besson-Fournier C, et al. Testosterone perturbs systemic iron  
56  
57 balance through activation of epidermal growth factor receptor signaling in the  
58  
59  
60

- 1  
2  
3  
4  
5 liver and repression of hepcidin. *Hepatology* 2014;59(2):683-94. doi:  
6  
7  
8 10.1002/hep.26648  
9
- 10  
11 21. Moriyama Y, Fisher JW. Effects of testosterone and erythropoietin on erythroid  
12  
13 colony formation in human bone marrow cultures. *Blood* 1975;45(5):665-70.  
14  
15
- 16  
17 22. D'Amico AV, Saegaert T, Chen MH, et al. Initial decline in hemoglobin during  
18  
19 neoadjuvant hormonal therapy predicts for early prostate specific antigen failure  
20  
21 following radiation and hormonal therapy for patients with intermediate and  
22  
23 high-risk prostate cancer. *Cancer* 2002;95(2):275-80. doi: 10.1002/cncr.10673  
24  
25  
26  
27
- 28  
29 23. Timilshina N, Hussain S, Breunis H, et al. Predictors of hemoglobin decline in non-  
30  
31 metastatic prostate cancer patients on androgen deprivation therapy: a matched  
32  
33 cohort study. *Support Care Cancer* 2011;19(11):1815-21. doi: 10.1007/s00520-  
34  
35 010-1023-6  
36  
37  
38
- 39  
40 24. Hicks BM, Klil-Drori AJ, Yin H, et al. Androgen Deprivation Therapy and the Risk  
41  
42 of Anemia in Men with Prostate Cancer. *Epidemiology* 2017;28(5):712-18. doi:  
43  
44 10.1097/ede.0000000000000678  
45  
46  
47  
48
- 49  
50 25. Rebbeck TR. Prostate Cancer Genetics: Variation by Race, Ethnicity, and  
51  
52 Geography. *Semin Radiat Oncol* 2017;27(1):3-10. doi:  
53  
54 10.1016/j.semradonc.2016.08.002  
55  
56  
57
- 58  
59 26. Taitt HE. Global Trends and Prostate Cancer: A Review of Incidence, Detection,  
60

- 1  
2  
3  
4  
5 and Mortality as Influenced by Race, Ethnicity, and Geographic Location.  
6  
7  
8 *American journal of men's health* 2018;12(6):1807-23. doi:  
9  
10 10.1177/1557988318798279  
11  
12  
13  
14 27. McLean E, Cogswell M, Egli I, et al. Worldwide prevalence of anaemia, WHO  
15  
16 Vitamin and Mineral Nutrition Information System, 1993-2005. *Public Health*  
17  
18 *Nutr* 2009;12(4):444-54. doi: 10.1017/s1368980008002401  
19  
20  
21  
22  
23 28. Poon DMC, Chan T, Chan K, et al. Preliminary efficacy and tolerability of  
24  
25 chemohormonal therapy in metastatic hormone-naive prostate cancer: The first  
26  
27 real-life experience in Asia. *Asia Pac J Clin Oncol* 2018;14(4):347-52. doi:  
28  
29 10.1111/ajco.12874  
30  
31  
32  
33  
34  
35 29. Liu CY, Hung YT, Chuang YL, et al. Incorporating development stratification of  
36  
37 Taiwan townships into sampling design of large scale health interview survey. *J*  
38  
39 *Health Manag* 2006;4(1):1-22.  
40  
41  
42  
43  
44 30. Strum SB, McDermed JE, Scholz MC, et al. Anaemia associated with androgen  
45  
46 deprivation in patients with prostate cancer receiving combined hormone  
47  
48 blockade. *Br J Urol* 1997;79(6):933-41. doi: 10.1046/j.1464-410x.1997.00234.x  
49  
50  
51  
52  
53 31. Choo R, Chander S, Danjoux C, et al. How are hemoglobin levels affected by  
54  
55 androgen deprivation in non-metastatic prostate cancer patients? *The Canadian*  
56  
57 *journal of urology* 2005;12(1):2547-52.  
58  
59  
60

- 1  
2  
3  
4  
5 32. Shahani S, Braga-Basaria M, Maggio M, et al. Androgens and erythropoiesis: past  
6  
7 and present. *J Endocrinol Invest* 2009;32(8):704-16. doi: 10.1007/bf03345745  
8  
9
- 10 33. Dai D, Han S, Li L, et al. Anemia is associated with poor outcomes of metastatic  
11  
12 castration-resistant prostate cancer, a systematic review and meta-analysis.  
13  
14 *American journal of translational research* 2018;10(12):3877-86.  
15  
16  
17  
18  
19
- 20 34. Pan X, Suzuki N, Hirano I, et al. Isolation and characterization of renal  
21  
22 erythropoietin-producing cells from genetically produced anemia mice. *PLoS*  
23  
24 *One* 2011;6(10):e25839. doi: 10.1371/journal.pone.0025839  
25  
26  
27
- 28 35. Mirand EA, Gordon AS, Wenig J. Mechanism of testosterone action in  
29  
30 erythropoiesis. *Nature* 1965;206(981):270-2. doi: 10.1038/206270a0  
31  
32  
33
- 34 36. Guo W, Li M, Bhasin S. Testosterone supplementation improves anemia in aging  
35  
36 male mice. *J Gerontol A Biol Sci Med Sci* 2014;69(5):505-13. doi:  
37  
38 10.1093/gerona/glt127  
39  
40  
41  
42
- 43 37. Guo W, Bachman E, Li M, et al. Testosterone administration inhibits hepcidin  
44  
45 transcription and is associated with increased iron incorporation into red blood  
46  
47 cells. *Aging cell* 2013;12(2):280-91. doi: 10.1111/accel.12052  
48  
49  
50  
51  
52  
53  
54  
55  
56  
57  
58  
59  
60

1  
2  
3  
4 **Figure Legend**  
5  
6

7 **Figure 1** Kaplan–Meier curve of the risk of iron-deficiency anaemia (IDA) among  
8  
9  
10 patients with prostate cancer during a 3-year follow-up period as stratified by the  
11  
12  
13 previous use or non-use of androgen deprivation therapy (ADT).  
14  
15  
16  
17  
18  
19  
20  
21  
22  
23  
24  
25  
26  
27  
28  
29  
30  
31  
32  
33  
34  
35  
36  
37  
38  
39  
40  
41  
42  
43  
44  
45  
46  
47  
48  
49  
50  
51  
52  
53  
54  
55  
56  
57  
58  
59  
60

For peer review only



**Table 1** Demographic characteristics of patients with prostate cancer stratified by the previous use or non-use of androgen deprivation therapy (ADT) ( $n=10,893$ )

| Characteristic             | Patients not receiving ADT ( $n=3,631$ ) |          | Patients receiving ADT ( $n=7,262$ ) |          | <i>p</i> value |
|----------------------------|------------------------------------------|----------|--------------------------------------|----------|----------------|
|                            | Total no.                                | Column % | Total no.                            | Column % |                |
| Age (years), mean (SD)     | 74.26 (8.81)                             |          | 74.46 (8.81)                         |          | 0.284          |
| Urbanisation level         |                                          |          |                                      |          | 0.792          |
| 1 (most urbanised)         | 943                                      | 25.97    | 1,816                                | 25.01    |                |
| 2                          | 871                                      | 23.99    | 1,734                                | 23.88    |                |
| 3                          | 492                                      | 13.55    | 1,024                                | 14.10    |                |
| 4                          | 492                                      | 13.55    | 1,011                                | 13.92    |                |
| 5 (least urbanised)        | 833                                      | 22.94    | 1,677                                | 23.09    |                |
| Geographic region          |                                          |          |                                      |          | 0.454          |
| Northern                   | 1,876                                    | 51.67    | 3,676                                | 50.62    |                |
| Central                    | 850                                      | 23.41    | 1,688                                | 23.24    |                |
| Southern                   | 860                                      | 23.68    | 1,789                                | 24.64    |                |
| Eastern                    | 45                                       | 1.24     | 109                                  | 1.50     |                |
| Monthly income             |                                          |          |                                      |          | 0.385          |
| NT\$0–15,840               | 2,426                                    | 66.81    | 4,826                                | 66.46    |                |
| NT\$15,841–25,000          | 932                                      | 25.67    | 1,931                                | 26.59    |                |
| $\geq$ NT\$25,001          | 273                                      | 7.52     | 505                                  | 6.95     |                |
| Hypertension               | 2,047                                    | 56.38    | 4,099                                | 56.44    | 0.946          |
| Hyperlipidemia             | 718                                      | 19.77    | 1,308                                | 18.01    | 0.026          |
| Diabetes                   | 792                                      | 21.81    | 1,511                                | 20.81    | 0.226          |
| Coronary heart disease     | 838                                      | 23.08    | 1,679                                | 23.12    | 0.962          |
| Inflammatory bowel disease | 29                                       | 0.80     | 65                                   | 0.90     | 0.608          |
| Gastrointestinal bleeding  | 122                                      | 3.36     | 265                                  | 3.65     | 0.442          |
| Previous cancers           | 348                                      | 9.58     | 533                                  | 7.34     | <0.001         |

Notes: The average exchange rate in 2015 was US\$1.00  $\approx$  New Taiwan (NT)\$30.

**Table 2** Crude and adjusted hazard ratios (HRs) for anaemia among patients with prostate cancer during a 3-year follow-up period stratified by the previous use or non-use of androgen deprivation therapy (ADT)

| Presence of iron-deficiency anaemia          | Total sample<br>( <i>n</i> = 10,893) | Patients receiving ADT<br>( <i>n</i> = 7,262) | Patients not receiving ADT<br>( <i>n</i> = 3,631) |
|----------------------------------------------|--------------------------------------|-----------------------------------------------|---------------------------------------------------|
| Three-year follow-up period                  |                                      |                                               |                                                   |
| Incidence rate per 100 person-years (95% CI) | 1.45 (1.29-1.61)                     | 1.66 (1.45-1.86)                              | 1.01 (0.78-1.25)                                  |
| Crude HR (95% CI)                            | --                                   | 1.64 (1.25-2.14)                              | 1.00                                              |
| Adjusted HR (95% CI) <sup>a,b</sup>          | --                                   | 1.58 (1.21-2.07)                              | 1.00                                              |
| Adjusted HR (95% CI) <sup>a,c</sup>          | --                                   | 1.62 (1.24-2.12)                              | 1.00                                              |

Notes: <sup>a</sup> Using a Cox proportional regression with data censored if individuals died during the 3-year follow-up period; <sup>b</sup> Adjustments were made for patients' geographic location, monthly income, urbanisation level, age and incidence of hyperlipidaemia, diabetes, hypertension, coronary heart disease and inflammatory bowel disease. <sup>c</sup> Adjustments were made for patients' geographic location, monthly income, urbanisation level, age and incidence of hyperlipidaemia, diabetes, hypertension, coronary heart disease, inflammatory bowel disease, other cancers and gastrointestinal bleeding.

CI, confidence interval

**Table 3** Crude and adjusted hazard ratios (HRs) for anaemia among patients with prostate cancer during a 3-year follow-up period stratified by the duration of androgen deprivation therapy (ADT)

| Presence of iron-deficiency anaemia          | Patients receiving short-term ADT (n =3,631) <sup>d</sup> | Patients receiving long-term ADT (n =3,634) <sup>d</sup> | Patients not receiving ADT (n = 3,631) |
|----------------------------------------------|-----------------------------------------------------------|----------------------------------------------------------|----------------------------------------|
| Three-year follow-up period                  |                                                           |                                                          |                                        |
| Incidence rate per 100 person-years (95% CI) | 2.24 (1.87-2.62)                                          | 1.25 (1.02-1.48)                                         | 1.01 (0.78-1.25)                       |
| Crude HR (95% CI)                            | 2.19 (1.64-2.92)                                          | 1.25 (0.93-1.69)                                         | 1.00                                   |
| Adjusted HR (95% CI) <sup>a,b</sup>          | 2.20 (1.64-2.94)                                          | 1.22 (0.90-1.65)                                         | 1.00                                   |
| Adjusted HR (95% CI) <sup>a,c</sup>          | 2.06 (1.53-2.76)                                          | 1.23 (0.91-1.66)                                         | 1.00                                   |

Notes: <sup>a</sup> Using a Cox proportional regression with data censored if individuals died during the 3-year follow-up period; <sup>b</sup> Adjustments were made for patients’ geographic location, monthly income, urbanisation level, age and incidence of hyperlipidemia, diabetes, hypertension, coronary heart disease and inflammatory bowel disease. <sup>c</sup> Adjustments were made for patients’ geographic location, monthly income, urbanisation level, age and incidence of hyperlipidaemia, diabetes, hypertension, coronary heart disease, inflammatory bowel disease, other cancers and gastrointestinal bleeding. <sup>d</sup> We categorised the patients receiving ADT into two levels according to the median duration of ADT use (144 days).  
 CI, confidence interval

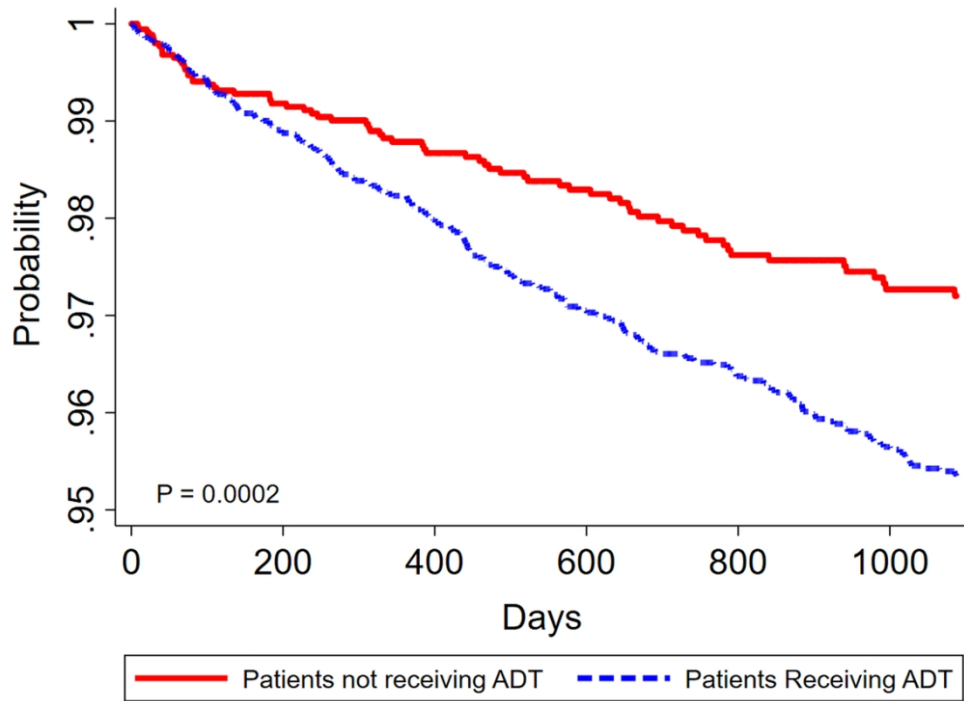

99x72mm (300 x 300 DPI)

## Supplementary Material

**Supplementary Table 1** Crude and adjusted hazard ratios (HRs) for anaemia among patients with prostate cancer during a 3-year follow-up period stratified by the different androgen deprivation therapy (ADT) exposure definition

| Presence of iron-deficiency anaemia          | Current ADT users ( $n = 109$ ) <sup>d</sup> | Past ADT users ( $n = 7,153$ ) <sup>d</sup> | Patients not receiving ADT ( $n = 3,631$ ) |
|----------------------------------------------|----------------------------------------------|---------------------------------------------|--------------------------------------------|
| Three-year follow-up period                  |                                              |                                             |                                            |
| Incidence rate per 100 person-years (95% CI) | 93.65 (76.07-111.24)                         | 0.94 (0.78-1.09)                            | 1.01 (0.78-1.25)                           |
| Crude HR (95% CI)                            | 90.74 (68.88-119.55)                         | 0.93 (0.69-1.24)                            | 1.00                                       |
| Adjusted HR (95% CI) <sup>a,b</sup>          | 89.64 (67.19-119.58)                         | 0.91 (0.68-1.22)                            | 1.00                                       |
| Adjusted HR (95% CI) <sup>a,c</sup>          | 81.52 (60.58-109.69)                         | 0.90 (0.67-1.20)                            | 1.00                                       |

Notes: <sup>a</sup> Using a Cox proportional regression with data censored if individuals died during the 3-year follow-up period; <sup>b</sup> Adjustments were made for patients' geographic location, monthly income, urbanisation level, age and incidence of hyperlipidemia, diabetes, hypertension, coronary heart disease and inflammatory bowel disease. <sup>c</sup> Adjustments were made for patients' geographic location, monthly income, urbanisation level, age and incidence of hyperlipidaemia, diabetes, hypertension, coronary heart disease, inflammatory bowel disease, other cancers and gastrointestinal bleeding. <sup>d</sup> We categorised the patients receiving ADT into current users (patients who had received ADT prior to the outcome date within 1 month) and past users (other remaining users).

CI, confidence interval

**Supplementary Table 2** Sensitivity analysis

| Outcome variable                             | Outcome definition: cases with anaemia diagnosis |                            | Outcome definition: cases with anaemia diagnosis and receiving iron supplementation |                            |
|----------------------------------------------|--------------------------------------------------|----------------------------|-------------------------------------------------------------------------------------|----------------------------|
|                                              | Patients receiving ADT                           | Patients not receiving ADT | Patients receiving ADT                                                              | Patients not receiving ADT |
|                                              | (n = 7,262)                                      | (n = 3,631)                | (n = 7,262)                                                                         | (n = 3,631)                |
| Presence of iron-deficiency anaemia          |                                                  |                            |                                                                                     |                            |
| Three-year follow-up period                  |                                                  |                            |                                                                                     |                            |
| Incidence rate per 100 person-years (95% CI) | 1.66 (1.45-1.86)                                 | 1.01 (0.78-1.25)           | 1.66 (1.45-1.86)                                                                    | 0.08 (0.02-0.15)           |
| Crude HR (95% CI)                            | 1.64 (1.25-2.14)                                 | 1.00                       | 19.56 (8.69-44.02)                                                                  | 1.00                       |
| Adjusted HR (95% CI) <sup>a,b</sup>          | 1.58 (1.21-2.07)                                 | 1.00                       | 19.43 (8.63-43.76)                                                                  | 1.00                       |
| Adjusted HR (95% CI) <sup>a,c</sup>          | 1.62 (1.24-2.12)                                 | 1.00                       | 19.14 (8.50-43.10)                                                                  | 1.00                       |

Notes: <sup>a</sup> Using a Cox proportional regression with data censored if individuals died during the 3-year follow-up period; <sup>b</sup> Adjustments were made for patients' geographic location, monthly income, urbanisation level, age and incidence of hyperlipidaemia, diabetes, hypertension, coronary heart disease and inflammatory bowel disease. <sup>c</sup> Adjustments were made for patients' geographic location, monthly income, urbanisation level, age and incidence of hyperlipidaemia, diabetes, hypertension, coronary heart disease, inflammatory bowel disease, other cancers and gastrointestinal bleeding.

CI, confidence interval
